# Supplementary material for: Aryne-induced dearomatized phosphonylation of electron-deficient azaarenes
Source: Royal Society of Chemistry journal article supplement (doi:10.1039/c6ra02128j), 2016-01-01

## *Supporting Information for*

### **Aryne-induced dearomatic phosphonylation of electron-deficient azaarenes**

Kai Liu<sup>a</sup>, Li-Li Liu<sup>a</sup>, Cheng-Zhi Gu<sup>a</sup>, Bin Dai<sup>a\*</sup> and Lin He<sup>a\*</sup>

*School of Chemistry and Chemical Engineering, Shihezi University,  
Xinjiang Autonomous Region, 832000, P. R. China.*

*Email: db\_tea@shzu.edu.cn; helin@shzu.edu.cn.*

### **Contents**

1. General Methods & General experimental procedure page S2
2. Spectroscopic data for all products page S2-S16
3. Copies of <sup>1</sup>H, <sup>13</sup>C and <sup>19</sup>F NMR spectra page S17-S37

**General procedure for the three-component reaction of arynes with N-heteroaromatics and dialkyl phosphites:**

A 10 mL round-bottom flask containing KF (35 mg, 0.6 mmol) and 18-crown-6 (159 mg, 0.6 mmol) was evacuated and purged with nitrogen gas three times. Freshly distilled THF (2.0 mL), aryne precursor (110  $\mu$ L, 0.45 mmol), quinoline (36  $\mu$ L, 0.3 mmol), and dimethyl phosphite (42  $\mu$ L, 0.45 mmol) were subsequently added to the system and the reaction mixture was stirred at room temperature for 14 h. The mixture was concentrated and the residue was purified by column chromatography on silica gel (petroleum ether/ethyl acetate = 5/1) to afford the pure product **4a** in 89% yield (84 mg) as a dark brown oil.

**1,2-Dihydro-1-phenyl-2- dimethyl phosphate-quinoline (4a):**

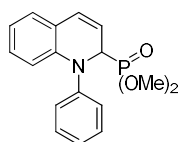

$^1\text{H}$  NMR (400 MHz, dimethyl sulfoxide- $d_6$ ):  $\delta$  3.39 (d,  $J$  = 10.4 Hz, 3H), 3.60 (d,  $J$  = 10.4 Hz, 3H), 5.0 (ddd,  $J$  = 7.5, 6.4, 1.1 Hz, 1H), 5.75-5.80 (m, 1H), 6.6 (dd,  $J$  = 9.4, 5.3 Hz, 1H), 6.85-6.89 (m, 2H), 7.01-7.09 (m, 2H), 7.13 (dd,  $J$  = 7.4, 1.2 Hz, 1H), 7.2-7.3 (m, 4H);  $^{13}\text{C}$  NMR (100MHz, dimethyl sulfoxide- $d_6$ ):  $\delta$  148.4, 141.2, 129.6, 128.7, 127.6, 127.5, 127.4, 127.3, 126.3, 123.2, 122.0, 121.6, 120.8, 120.0, 59.8, 58.3, 53.2; IR (KBr):  $\nu$  = 2978, 2855, 1663, 1593,

1493, 1462, 1377, 1327, 1246, 1188, 1045, 968, 829, 760, 698 cm<sup>-1</sup>;

HRMS (ESI) found: 315.1017, calcd for C<sub>17</sub>H<sub>18</sub>NO<sub>3</sub>P: 315.1024.

**1,2-Dihydro-1-phenyl-2-diethyl phosphite-quinoline (4b):**

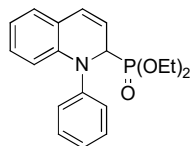

Prepared according to general procedure and purified by column chromatography on silica gel (PE/EA = 5/1) to afford **4b** as the pure product. Yield 70% (72 mg); dark brown oil; <sup>1</sup>H NMR (400 MHz, dimethyl sulfoxide-d<sub>6</sub>): δ 0.96 (t, J = 7.1 Hz, 3H), 1.15 (t, J = 7.1 Hz, 3H), 3.65-3.75 (m, 1H), 3.86-4.01 (m, 3H), 4.93 (ddd, J = 7.5, 6.4, 1.1 Hz, 1H), 5.78 (ddd, J = 9.5, 6.4, 4.8 Hz, 1H), 6.64 (dd, J = 9.5, 5.4 Hz, 1H), 6.82-6.87 (m, 2H), 7.01-7.12 (m, 3H), 7.27-7.36 (m, 4H); <sup>13</sup>C NMR (100MHz, dimethyl sulfoxide-d<sub>6</sub>): δ 148.6, 141.4, 129.5, 128.6, 127.4, 127.3, 127.2, 126.5, 126.4, 123.2, 122.2, 121.4, 121.0, 120.0, 62.6, 62.5, 62.4, 60.3, 58.8; IR (KBr.): ν=3063, 2982, 1667, 1593, 1493, 1450, 1393, 1366, 1254, 1161, 1072, 1022, 964, 756, 698 cm<sup>-1</sup>; HRMS (ESI) found: 343.1332, calcd for C<sub>19</sub>H<sub>22</sub>NO<sub>3</sub>P: 343.1337.

**1,2-Dihydro-1-phenyl-2-dinpropyl phosphite-quinoline (4c):**

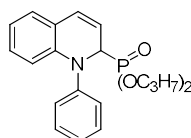

Prepared according to general procedure and purified by column chromatography on silica gel (PE/EA = 8/1) to afford **4c** as the pure product. Yield 75% (83 mg); pale yellow oil; <sup>1</sup>H NMR

(400 MHz, dimethyl sulfoxide- $d_6$ ):  $\delta$  0.80 (d,  $J = 6.2$  Hz, 3H), 4.38-4.67 (m, 3H), 4.83 (ddd,  $J = 7.5, 6.4, 1.1$  Hz, 1H), 5.75 (ddd,  $J = 9.6, 6.3, 4.6$  Hz, 1H), 6.48-6.70 (m, 2H), 6.82-7.11 (m, 6H), 7.20-7.42 (m, 7H), 7.52-7.65 (m, 2H), 7.75-8.05 (m, 1H);  $^{13}\text{C}$  NMR (100MHz, dimethyl sulfoxide- $d_6$ ):  $\delta$  161.6, 148.9, 141.4, 140.7, 138.1, 130.9, 130.5, 129.4, 128.5, 127.4, 126.5, 123.0, 122.6, 122.1, 121.4, 120.3, 115.7, 74.1, 71.1, 60.9, 59.3; IR (KBr):  $\nu=2928, 1767, 1643, 1204, 1049, 1026, 1003$   $\text{cm}^{-1}$ ; HRMS (ESI) found: 371.1646, calcd for  $\text{C}_{21}\text{H}_{26}\text{NO}_3\text{P}$ : 371.1650.

**1,2-Dihydro-1-phenyl-2-dibenzyl phosphite-quinoline (4d):**

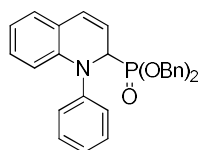

Prepared according to general procedure and purified by column chromatography on silica gel (PE/EA = 5/1) to afford **4d** as the pure product. Yield 71% (99 mg); pale yellow oil;  $^1\text{H}$  NMR (400 MHz, dimethyl sulfoxide- $d_6$ ):  $\delta$  5.06 (d,  $J = 9.4$  Hz, 1H), 6.51 (d,  $J = 8.4$  Hz, 2H), 6.68 (d,  $J = 9.6$  Hz, 2H), 7.22-7.27 (m, 2H), 7.29-7.35 (m, 4H), 7.38-7.45 (m, 4H), 7.53-7.65 (m, 7H), 7.78 (d,  $J = 7.7$  Hz, 2H), 8.04 (d,  $J = 9.6$  Hz, 2H);  $^{13}\text{C}$  NMR (100MHz, dimethyl sulfoxide- $d_6$ ):  $\delta$  161.6, 141.3, 140.7, 138.1, 131.0, 130.5, 129.5, 129.2, 129.1, 129.0, 128.8, 128.4, 122.6, 122.1, 120.3, 115.7, 99.9, 66.9; IR (KBr):  $\nu=1771, 1643, 1585, 1566, 1450, 1404, 1331,$

1250, 1215, 1196, 1142, 760, 698  $\text{cm}^{-1}$ ; HRMS (ESI) found: 467.1646, calcd for  $\text{C}_{29}\text{H}_{26}\text{NO}_3\text{P}$ : 467.1650.

**6-methyl -2- dimethyl phosphate -1-phenyl-1, 2-dihydroquinoline (4f):**

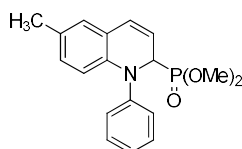

Prepared according to general procedure and purified by column chromatography on silica gel (PE/EA = 5/1) to afford **4f** as the pure product. Yield 72% (71 mg); pale yellow oil;  $^1\text{H}$  NMR (400 MHz, dimethyl sulfoxide- $d_6$ ):  $\delta$  2.34 (s, 3H), 3.32 (s, 6H), 6.41 (d,  $J = 8.6$  Hz, 1H), 6.65 (d,  $J = 9.5$  Hz, 1H), 7.23 (dd,  $J = 8.5, 1.8$  Hz, 1H), 7.28-7.32 (m, 2H), 7.51-7.65 (m, 5H), 7.97 (d,  $J = 9.5$  Hz, 1H);  $^{13}\text{C}$  NMR (100MHz, dimethyl sulfoxide- $d_6$ ):  $\delta$  161.4, 140.4, 139.3, 138.2, 132.1, 131.7, 130.5, 129.4, 129.1, 128.6, 122.1, 120.2, 115.7, 20.5; IR (KBr):  $\nu=3838, 2924, 2496, 1971, 1724, 1659, 1566, 1493, 1381, 1331, 1242, 760$   $\text{cm}^{-1}$ ; HRMS (ESI) found: 329.1173, calcd for  $\text{C}_{18}\text{H}_{20}\text{NO}_3\text{P}$ : 329.1181.

**6-methoxy-2-dimethyl phosphate -1-phenyl-1, 2-dihydroquinoline (4g):**

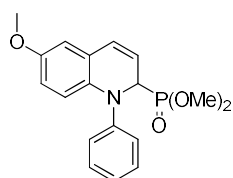

Prepared according to general procedure and purified by column chromatography on silica gel (PE/EA = 3/1) to afford **4g** as the pure product. Yield 67% (69 mg); pale yellow oil;  $^1\text{H}$  NMR

(400 MHz, dimethyl sulfoxide- $d_6$ ):  $\delta$  3.32 (s, 6H), 3.79 (m, 3H), 6.44 (d,  $J = 9.2$  Hz, 1H), 6.68 (d,  $J = 9.2$  Hz, 1H), 7.06 (dd,  $J = 9.2$ , 2.9 Hz, 1H), 7.28-7.31 (m, 2H), 7.33-7.35 (m, 1H), 7.52-7.64 (m, 4H), 7.98 (d,  $J = 9.5$  Hz, 1H);  $^{13}\text{C}$  NMR (100MHz, dimethyl sulfoxide- $d_6$ ):  $\delta$  161.1, 154.8, 140.2, 138.3, 135.8, 131.9, 131.8, 130.5, 129.5, 129.3, 129.2, 122.6, 121.0, 119.5, 117.0, 110.9, 56.1, 53.0; IR (KBr):  $\nu = 2951, 2855, 1778, 1728, 1435, 1381, 1342, 1292, 1207, 760$   $\text{cm}^{-1}$ ; HRMS (ESI) found: 345.1039, calcd for  $\text{C}_{18}\text{H}_{20}\text{NO}_4\text{P}$ : 345.1052.

### **6-chloro-2-dimethyl phosphate -1-phenyl-1,2-dihydroquinoline**

**(4h):**

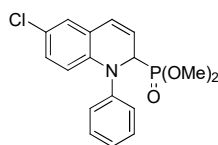

Prepared according to general procedure and purified by column chromatography on silica gel (PE/EA = 3/1) to afford **4h** as the pure product. Yield 72% (75 mg); dark brown oil;  $^1\text{H}$  NMR (400 MHz, dimethyl sulfoxide- $d_6$ ):  $\delta$  3.45 (d,  $J = 10.6$  Hz, 3H), 3.63 (d,  $J = 10.6$  Hz, 3H), 5.08 (dd,  $J = 16.3, 6.1$  Hz, 1H), 5.80-5.87 (m, 1H), 6.66 (dd,  $J = 9.2, 5.8$  Hz, 1H), 6.82-6.87 (m, 1H), 7.05-7.11 (m, 2H), 7.23 (s, 1H), 7.31-7.35 (m, 4H);  $^{13}\text{C}$  NMR (100MHz, dimethyl sulfoxide- $d_6$ ):  $\delta$  148.0, 140.2, 129.7, 128.3, 127.9, 127.8, 126.8, 126.5, 126.4, 124.8, 123.8, 122.4, 122.2, 121.4, 59.8, 58.2, 53.4; IR

(KBr):  $\nu=1667, 1481, 1369, 1258, 1204, 1030, 826, 760 \text{ cm}^{-1}$ ;

HRMS (ESI) found: 349.0625, calcd for  $\text{C}_{17}\text{H}_{17}\text{ClNO}_3\text{P}$ : 349.0635.

### 6-bromo-2-dimethyl phosphate -1-phenyl-1,2-dihydroquinoline

**(4i):**

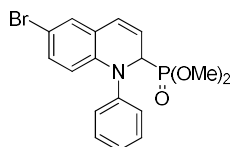

Prepared according to general procedure and purified by column chromatography on silica gel (PE/EA = 3/1) to afford **4i** as the pure product. Yield 78% (92 mg); pale yellow oil;  $^1\text{H}$  NMR (400 MHz, dimethyl sulfoxide- $d_6$ ):  $\delta$  3.44 (d,  $J = 10.6$  Hz, 3H), 3.62 (d,  $J = 10.6$  Hz, 3H), 5.08 (ddd,  $J = 7.5, 6.4, 1.1$  Hz, 1H), 5.82 (ddd,  $J = 9.5, 6.4, 4.8$  Hz, 1H), 6.66 (dd,  $J = 9.6, 5.4$  Hz, 1H), 6.76-6.80 (m, 1H), 7.05-7.11 (m, 1H), 7.17-7.21 (m, 1H), 7.31-7.36 (m, 5H);  $^{13}\text{C}$  NMR (100MHz, dimethyl sulfoxide- $d_6$ ):  $\delta$  147.9, 147.8, 140.7, 131.1, 129.8, 129.6, 128.3, 126.4, 126.3, 123.8, 122.5, 122.1, 121.7, 112.5, 59.8, 58.2, 53.3; IR (KBr):  $\nu=3044, 2982, 2824, 1663, 1589, 1497, 1416, 1377, 1269, 1215, 1030, 826, 760 \text{ cm}^{-1}$ ; HRMS (ESI) found: 393.0131, calcd for  $\text{C}_{17}\text{H}_{17}\text{BrNO}_3\text{P}$ : 393.0129.

### 6-fluoro-2-dimethyl phosphate -1-phenyl-1,2-dihydroquinoline

**(4j):**

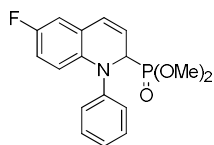

Prepared according to general procedure and purified by column chromatography on silica gel (PE/EA = 3/1) to afford **4j**

as the pure product. Yield 75% (75 mg); dark brown oil;  $^1\text{H}$  NMR (400 MHz, dimethyl sulfoxide- $d_6$ ):  $\delta$  3.44 (d,  $J = 10.6$  Hz, 3H), 3.62 (d,  $J = 10.6$  Hz, 3H), 5.07 (ddd,  $J = 7.5, 6.5, 1.1$  Hz, 1H), 5.82-5.89 (m, 1H), 6.66 (dd,  $J = 9.6, 5.2$  Hz, 1H), 6.88-6.93 (m, 2H), 7.01-7.07 (m, 2H), 7.24-7.33 (m, 4H);  $^{13}\text{C}$  NMR (100MHz, dimethyl sulfoxide- $d_6$ ):  $\delta$  158.5, 156.2, 148.9, 137.3, 129.7, 128.1, 126.7, 123.1, 122.7, 122.2, 121.5, 115.3, 113.6, 113.3, 59.8, 58.2, 53.3; IR (KBr):  $\nu=3059, 2955, 2924, 2855, 1663, 1593, 1543, 1442, 1369, 1250, 1146, 1030, 872, 818, 764, 698, 602$   $\text{cm}^{-1}$ ; HRMS (ESI) found: 333.0917, calcd for  $\text{C}_{17}\text{H}_{17}\text{FNO}_3\text{P}$ : 333.0930.

**3-Bromo-2- dimethyl phosphate -1-phenyl-1,2-dihydroquinoline (4k):**

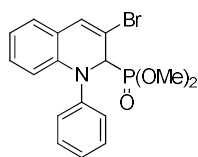

Prepared according to general procedure and purified by column chromatography on silica gel (PE/EA = 3/1) to afford **4k** as the pure product. Yield 60% (71 mg); pale yellow oil;  $^1\text{H}$  NMR (400 MHz, dimethyl sulfoxide- $d_6$ ):  $\delta$  3.41 (d,  $J = 10.6$  Hz, 3H), 3.66 (d,  $J = 10.6$  Hz, 3H), 5.08 (d,  $J = 16.8$  Hz, 1H), 6.94-6.98 (m, 2H), 7.05-7.10 (m, 1H), 7.13-7.27 (m, 5H), 7.30-7.35 (m, 2H);  $^{13}\text{C}$  NMR (100MHz, dimethyl sulfoxide- $d_6$ ):  $\delta$  147.9, 139.5, 130.3, 130.2, 129.8, 129.2, 127.3, 126.9, 123.7, 122.5, 121.8, 120.8, 108.5, 65.8, 64.2, 53.7, 53.4; IR (KBr):  $\nu=3059, 2955, 2855, 1593, 1493, 1450, 1362, 1285, 1184, 1119, 1072, 1026, 837, 802, 698$   $\text{cm}^{-1}$ ; HRMS (ESI) found: 393.0134, calcd for



C<sub>17</sub>H<sub>17</sub>BrNO<sub>3</sub>P: 393.0129.

**4-methyl-2- dimethyl phosphate -1-phenyl-1,2-dihydroquinoline (4l):**

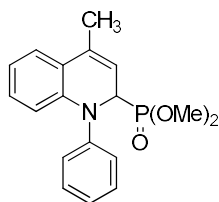

Prepared according to general procedure and purified by column chromatography on silica gel (PE/EA = 3/1) to afford **4l** as the pure product. Yield 55% (54 mg); pale blue oil; <sup>1</sup>H NMR (400 MHz, dimethyl sulfoxide-d<sub>6</sub>): δ 2.05 (d, *J* = 5.3 Hz, 3H), 3.36 (d, *J* = 10.6 Hz, 3H), 3.58 (d, *J* = 10.6 Hz, 3H), 4.97 (ddd, *J* = 7.6, 6.6, 1.1 Hz, 1H), 5.59-5.63 (m, 1H), 6.89-6.95 (m, 2H), 6.99-7.04 (m, 1H), 7.07-7.13 (m, 1H), 7.27-7.32 (m, 5H); <sup>13</sup>C NMR (100MHz, dimethyl sulfoxide-d<sub>6</sub>): δ 148.4, 141.1, 132.6, 132.4, 129.6, 128.6, 127.8, 127.7, 124.5, 122.9, 121.6, 121.5, 120.2, 117.5, 99.9, 59.5, 57.9, 53.1; IR (KBr): ν=2859, 2338, 1663, 1593, 1489, 1447, 1366, 1254, 1026, 818, 760 cm<sup>-1</sup>; HRMS (ESI) found: 329.1173, calcd for C<sub>18</sub>H<sub>20</sub>NO<sub>3</sub>P: 329.1181.

**1,2-Dihydro-1-phenyl-2-dimethyl phosphate-isoquinoline (4m):**

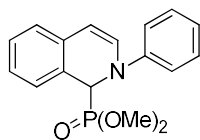

Prepared according to general procedure and purified by column chromatography on silica gel (PE/EA = 5/1) to afford **4m** as the pure product. Yield 83% (78 mg); pale yellow oil; <sup>1</sup>H NMR (400 MHz, dimethyl sulfoxide-d<sub>6</sub>): δ 3.58 (d, *J* = 10.4 Hz, 3H), 3.66

(d,  $J = 10.4$  Hz, 3H), 5.55 (dd,  $J = 12.9, 1.2$  Hz, 1H), 5.99 (d,  $J = 7.4$  Hz, 1H), 6.64 (dd,  $J = 7.4, 1.4$  Hz, 1H), 7.03 (t,  $J = 7.3$  Hz, 1H), 7.08-7.11 (m, 1H), 7.14-7.21 (m, 4H), 7.22-7.28 (m, 1H), 7.33-7.38 (m, 2H);  $^{13}\text{C}$  NMR (100MHz, dimethyl sulfoxide- $\text{d}_6$ ):  $\delta$  145.1, 132.8, 129.9, 129.6, 129.5, 128.6, 127.9, 127.5, 126.4, 124.9, 123.7, 121.5, 116.9, 106.9, 58.7, 57.2, 53.3; IR (KBr):  $\nu = 2955, 2924, 2855, 1659, 1597, 1493, 1462, 1231, 1038, 760, 690, 548, 471$   $\text{cm}^{-1}$ ; HRMS (ESI) found: 315.1019, calcd for  $\text{C}_{17}\text{H}_{18}\text{NO}_3\text{P}$ : 315.1024.

**5-bromo-2-dimethyl phosphate-1-phenyl-1, 2-dihydroisoquinoline (4n):**

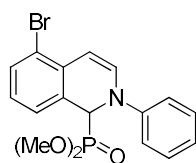

Prepared according to general procedure and purified by column chromatography on silica gel (PE/EA = 5/1) to afford **4n** as the pure product. Yield 77% (91 mg); pale yellow oil;  $^1\text{H}$  NMR (400 MHz, dimethyl sulfoxide- $\text{d}_6$ ):  $\delta$  3.50 (d,  $J = 10.6$  Hz, 3H), 3.55 (d,  $J = 10.6$  Hz, 3H), 5.99 (d,  $J = 13.3$  Hz, 1H), 6.04 (d,  $J = 7.5$  Hz, 1H), 6.96-7.09 (m, 3H), 7.20-7.26 (m, 3H), 7.32-7.38 (m, 2H), 7.49 (d,  $J = 8.1$  Hz, 1H);  $^{13}\text{C}$  NMR (100MHz, dimethyl sulfoxide- $\text{d}_6$ ):  $\delta$  172.5, 170.8, 144.5, 132.5, 132.4, 132.2, 129.5, 127.6, 127.5, 126.8, 122.2, 118.4, 117.4, 104.6, 58.8, 57.3, 53.4; IR (KBr):  $\nu = 3888, 3707, 3595, 2943, 2851, 2284, 1593, 1443, 1423, 1265, 1234, 1037, 760,$

694  $\text{cm}^{-1}$ ; HRMS (ESI) found: 393.0131, calcd for  $\text{C}_{17}\text{H}_{17}\text{BrNO}_3\text{P}$ : 393.0129.

**3-acetonitril-2-dimethyl phosphate-1-phenyl-1, 2-dihydroisoquinoline (4o):**

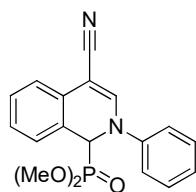

Prepared according to general procedure and purified by column chromatography on silica gel (PE/EA = 3/1) to afford **4o** as the pure product. Yield 50% (51 mg); pale yellow oil;  $^1\text{H}$  NMR (400 MHz, dimethyl sulfoxide- $\text{d}_6$ ):  $\delta$ =3.44 (d,  $J$  = 10.6 Hz, 3H), 3.51 (d,  $J$  = 10.6 Hz, 3H), 6.18 (d,  $J$  = 12.2 Hz, 1H), 7.17-7.23 (m, 2H), 7.27-7.32 (m, 2H), 7.36-7.51 (m, 5H), 7.94 (d,  $J$  = 1 Hz, 1H);  $^{13}\text{C}$  NMR (100MHz, dimethyl sulfoxide- $\text{d}_6$ ):  $\delta$  143.8, 143.2, 129.7, 129.5, 128.9, 128.6, 128.5, 127.8, 125.0, 123.1, 121.1, 120.1, 118.7, 87.7, 87.6, 58.9, 57.4, 53.6; IR (KBr):  $\nu$ =3838, 3738, 3657, 2928, 2859, 2307, 2203, 1879, 1678, 1489, 1450, 1350, 1242, 1022, 748  $\text{cm}^{-1}$ ; HRMS (ESI) found: 340.0971, calcd for  $\text{C}_{18}\text{H}_{17}\text{N}_2\text{O}_3\text{P}$ : 340.0977.

**1,2-Dihydro-1-phenyl-2-dimethyl phosphate-1, 10-Phenanthroline hydrate (4p):**

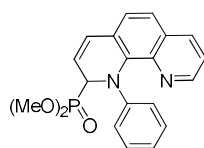

Prepared according to general procedure and purified by column chromatography on silica gel (PE/EA = 2/1) to afford **4p**

as the pure product. Yield 70% (77 mg); pale yellow oil;  $^1\text{H}$  NMR (400 MHz, dimethyl sulfoxide- $d_6$ ):  $\delta$  3.32 (s, 1H), 3.46-3.49 (m, 2H), 3.62 (d,  $J = 10.2$  Hz, 3H), 5.19 (dd,  $J = 21.4, 5.9$  Hz, 1H), 5.88-5.95 (m, 1H), 6.79-6.93 (m, 4H), 7.09-7.16 (m, 2H), 7.34 (dd,  $J = 8.2, 4.1$  Hz, 1H), 7.44-7.48 (m, 1H), 7.61-7.65 (m, 1H), 8.21-8.25 (m, 1H), 8.49 (dd,  $J = 4.1, 1.6$  Hz, 1H);  $^{13}\text{C}$  NMR (100MHz, dimethyl sulfoxide- $d_6$ ):  $\delta$  151.7, 149.2, 142.2, 136.7, 136.4, 129.2, 128.9, 128.4, 127.8, 126.3, 123.3, 122.4, 122.0, 121.4, 120.9, 70.3, 61.9, 60.3, 54.2, 53.5; IR (KBr):  $\nu=3946, 3761, 3561, 3051, 2951, 2870, 2338, 2164, 1979, 1902, 1593, 1493, 1447, 1373, 1250, 1111, 1068, 961, 837, 806, 756, 660, 579$   $\text{cm}^{-1}$ ; HRMS (ESI) found: 366.1127, calcd for  $\text{C}_{20}\text{H}_{19}\text{N}_2\text{O}_3\text{P}$ : 366.1133.

**1-(2-naphthylphenyl)-2-dimethyl phosphate-1, 2-dihydroquinoline (4q):**

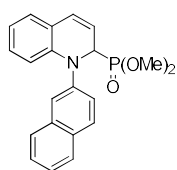

Prepared according to general procedure and purified by column chromatography on silica gel (PE/EA = 5/1) to afford **4q** as the pure product. Yield 82% (90 mg); pale yellow oil;  $^1\text{H}$  NMR (400 MHz, dimethyl sulfoxide- $d_6$ ):  $\delta$  3.42 (d,  $J = 10.6$  Hz, 3H), 3.63 (d,  $J = 10.6$  Hz, 3H), 5.21 (ddd,  $J = 7.5, 6.5, 1$  Hz, 1H), 5.83 (ddd,  $J = 9.4, 6.3, 4.8$  Hz, 1H), 6.67-6.73 (m, 1H), 6.89-6.96 (m, 2H), 7.07-7.13 (m, 1H), 7.17 (dd,  $J = 7.4, 1.2$  Hz, 1H), 7.36-7.41 (m, 1H),

7.43-7.49 (m, 2H), 7.73-7.80 (m, 2H), 7.80-7.85 (m, 2H);  $^{13}\text{C}$  NMR (100MHz, dimethyl sulfoxide- $d_6$ ):  $\delta$  145.9, 141.0, 134.3, 130.0, 129.0, 128.7, 127.9, 127.6, 127.5, 126.9, 126.5, 126.4, 125.0, 122.4, 121.9, 121.1, 120.0, 118.1, 59.9, 58.3, 53.3; IR (KBr):  $\nu$ =2920, 2789, 2368, 1709, 1674, 1574, 1254, 1137, 1115, 806, 796, 401  $\text{cm}^{-1}$ ; HRMS (ESI) found: 365.1176, calcd for  $\text{C}_{21}\text{H}_{20}\text{NO}_3\text{P}$ : 365.1181.

**1-(2-naphthylphenyl)-2-dimethyl phosphate-1,  
2-dihydroisoquinoline (4r):**

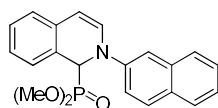

Prepared according to general procedure and purified by column chromatography on silica gel (PE/EA = 5/1) to afford **4r** as the pure product. Yield 88% (96 mg); pale yellow oil;  $^1\text{H}$  NMR (400 MHz, dimethyl sulfoxide- $d_6$ ):  $\delta$  3.51 (d,  $J$  = 10.6 Hz, 3H), 3.54 (d,  $J$  = 10.6 Hz, 3H), 6.01 (d,  $J$  = 7.4 Hz, 1H), 6.07 (d,  $J$  = 13.2 Hz, 1H), 6.96 (dd,  $J$  = 7.4, 1.1 Hz, 1H), 7.09-7.19 (m, 2H), 7.21-7.28 (m, 2H), 7.31-7.36 (m, 1H), 7.43-7.49 (m, 1H), 7.52-7.57 (m, 2H), 7.82 (t,  $J$  = 8.7 Hz, 2H), 7.87-7.91 (m, 1H);  $^{13}\text{C}$  NMR (100MHz, dimethyl sulfoxide- $d_6$ ):  $\delta$  142.8, 134.2, 132.8, 130.0, 129.2, 129.0, 128.7, 128.0, 127.8, 127.3, 127.0, 126.5, 125.1, 124.3, 123.8, 118.3, 112.2, 107.5, 58.7, 57.2, 53.3; IR (KBr):  $\nu$ =3900, 2947, 2276, 1663, 1470, 1350, 1281, 1254, 1107, 1030, 961, 829  $\text{cm}^{-1}$ ; HRMS (ESI) found: 365.1176, calcd for  $\text{C}_{21}\text{H}_{20}\text{NO}_3\text{P}$ : 365.1181.

**1-(3-Methoxyphenyl)-2-dimethyl****phosphate-1,****2-dihydroquinoline (4s):**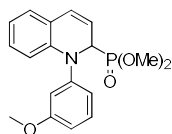

Prepared according to general procedure and purified by column chromatography on silica gel (PE/EA = 5/1) to afford **4s** as the pure product. Yield 86% (89 mg); pale yellow oil;  $^1\text{H}$  NMR (400 MHz, dimethyl sulfoxide- $d_6$ ):  $\delta$  3.39 (d,  $J = 10.6$  Hz, 3H), 3.59 (d,  $J = 10.6$  Hz, 3H), 3.71 (s, 3H), 5.07 (dd,  $J = 16.6, 6.4$  Hz, 1H), 5.78 (ddd,  $J = 9.5, 6.3, 4.9$  Hz, 1H), 6.59-6.67 (m, 2H), 6.83-6.95 (m, 4H), 7.05-7.21 (m, 3H);  $^{13}\text{C}$  NMR (100MHz, dimethyl sulfoxide- $d_6$ ):  $\delta = 160.5, 149.7, 141.0, 130.2, 128.6, 127.5, 127.4, 126.4, 121.8, 121.1, 120.4, 114.1, 108.4, 107.9, 59.7, 58.2, 55.5, 53.3$ ; IR (KBr):  $\nu = 3943, 2959, 2924, 2859, 1778, 1724, 1663, 1593, 1489, 1450, 1288, 1258, 1161, 1103, 1038, 694$   $\text{cm}^{-1}$ ; HRMS (ESI) found: 345.1130, calcd for  $\text{C}_{18}\text{H}_{20}\text{NO}_4\text{P}$ : 345.1130.

**1-(3-Methoxyphenyl)-2-dimethyl****phosphate-1,****2-dihydroisoquinoline (4t):**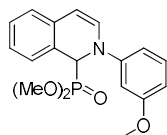

Prepared according to general procedure and purified by column chromatography on silica gel (PE/EA = 5/1) to afford **4t** as the pure product. Yield 90% (93 mg); pale yellow oil;  $^1\text{H}$  NMR (400 MHz, dimethyl sulfoxide- $d_6$ ):  $\delta$  3.48 (d,  $J = 10.6$  Hz, 3H), 3.53

(d,  $J = 10.6$  Hz, 3H), 3.78 (s, 3H), 5.86 (d,  $J = 13.1$  Hz, 1H), 5.93 (d,  $J = 7.4$  Hz, 1H), 6.54-6.58 (m, 1H), 6.72-6.76 (m, 2H), 6.79 (dd,  $J = 7.4, 1.2$  Hz, 1H), 7.05-7.09 (m, 1H), 7.11-7.16 (m, 1H), 7.19-7.24 (m, 3H);  $^{13}\text{C}$  NMR (100MHz, dimethyl sulfoxide- $\text{d}_6$ ):  $\delta$  160.5, 146.4, 132.8, 130.2, 129.9, 128.6, 127.9, 126.4, 125.1, 123.7, 109.3, 107.1, 103.0, 58.8, 57.3, 55.5, 53.3, 53.2; IR (KBr):  $\nu=2847, 1856, 1663, 1601, 1489, 1454, 1269, 1246, 1207, 1177, 1045, 999, 837, 787, 694$   $\text{cm}^{-1}$ ; HRMS (ESI) found: 345.1124, calcd for  $\text{C}_{18}\text{H}_{20}\text{NO}_4\text{P}$ : 345.1130.

### 1-(2-methylphenyl)-2-dimethyl phosphate-1, 2-dihydroquinoline

**(4u):**

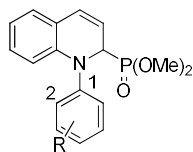

R= 2CH<sub>3</sub>, 3CH<sub>3</sub>

Prepared according to general procedure and purified by column chromatography on silica gel (PE/EA = 5/1) to afford **4u** as the pure product. Yield 80% (79 mg); pale yellow oil;  $^1\text{H}$  NMR (400 MHz, dimethyl sulfoxide- $\text{d}_6$ ):  $\delta$  2.24 (s, 3H), 3.39 (d,  $J = 10.6$  Hz, 3H), 3.59 (d,  $J = 10.6$  Hz, 3H), 5.01 (ddd,  $J = 7.2, 6.5, 1.0$  Hz, 1H), 5.76 (ddd,  $J = 9.5, 6.4, 4.9$  Hz, 1H), 6.62-6.67 (m, 2H), 6.82-6.88 (m, 3H), 7.04-7.14 (m, 4H), 7.16-7.21 (m, 1H);  $^{13}\text{C}$  NMR (100MHz, dimethyl sulfoxide- $\text{d}_6$ ):  $\delta = 166.3, 153.3, 146.1, 143.6, 134.2, 133.4, 132.3, 132.1, 131.0, 128.8, 127.4, 126.2, 125.5, 124.9, 124.1, 64.7, 63.1, 57.9$ ; IR (KBr):  $\nu=2920, 2851, 2326, 1724, 1663,$

1593, 1489, 1450, 1366, 1258, 1177, 1057, 964, 945, 833, 752, 698  $\text{cm}^{-1}$ ; HRMS (ESI) found: 329.1175, calcd for  $\text{C}_{18}\text{H}_{20}\text{NO}_3\text{P}$ : 329.1181.

**1-phenyl-6-dimethyl phosphate-Acridine (4v):**

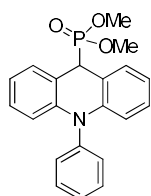

Prepared according to general procedure and purified by column chromatography on silica gel (PE/EA = 1/1) to afford **4v** as the pure product. Yield 55% (60 mg); pale yellow oil;  $^1\text{H}$  NMR (400 MHz, dimethyl sulfoxide- $\text{d}_6$ ):  $\delta$  3.50 (d,  $J = 10.4$  Hz, 6H), 4.92 (d,  $J = 25.2$  Hz, 1H), 6.20 (d,  $J = 8.2$  Hz, 2H), 6.87-6.93 (m, 2H), 7.00-7.06 (m, 2H), 7.25 (d,  $J = 7.6$  Hz, 2H), 7.36-7.40 (m, 2H), 7.54-7.60 (m, 1H), 7.66-7.72 (m, 2H);  $^{13}\text{C}$  NMR (100MHz, dimethyl sulfoxide- $\text{d}_6$ ):  $\delta$  142.7, 142.6, 140.6, 131.4, 131.2, 130.5, 130.4, 129.0, 128.2, 128.1, 121.1, 121.0, 117.0, 116.9, 114.3, 114.2, 53.6, 53.5, 42.8, 41.5.



# Compound 4a

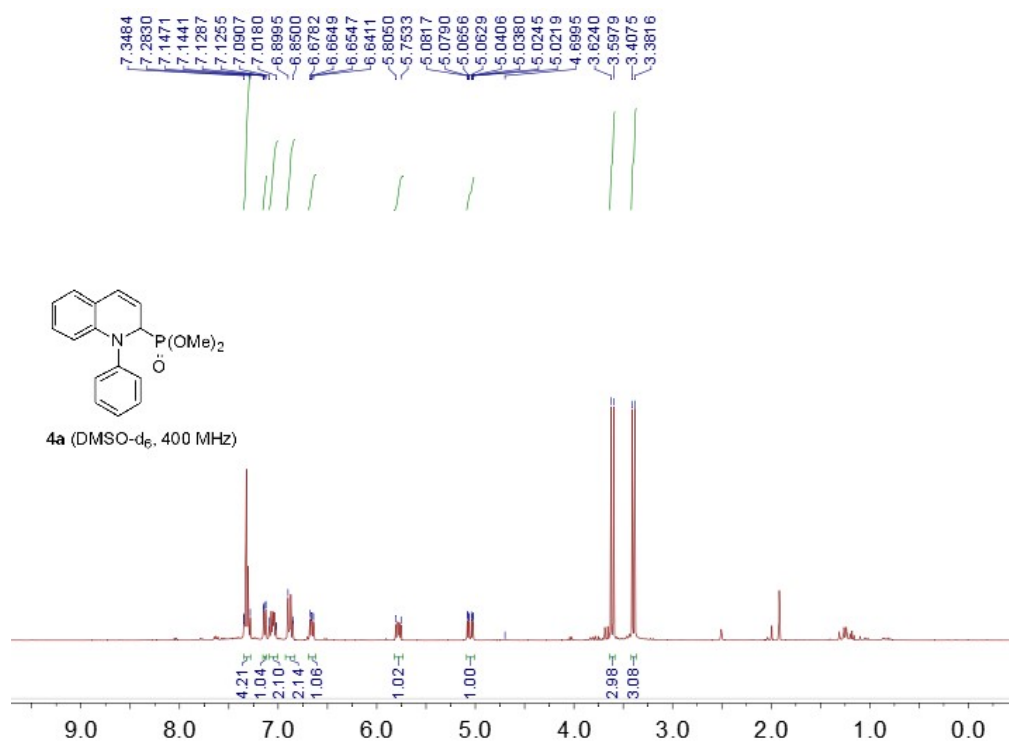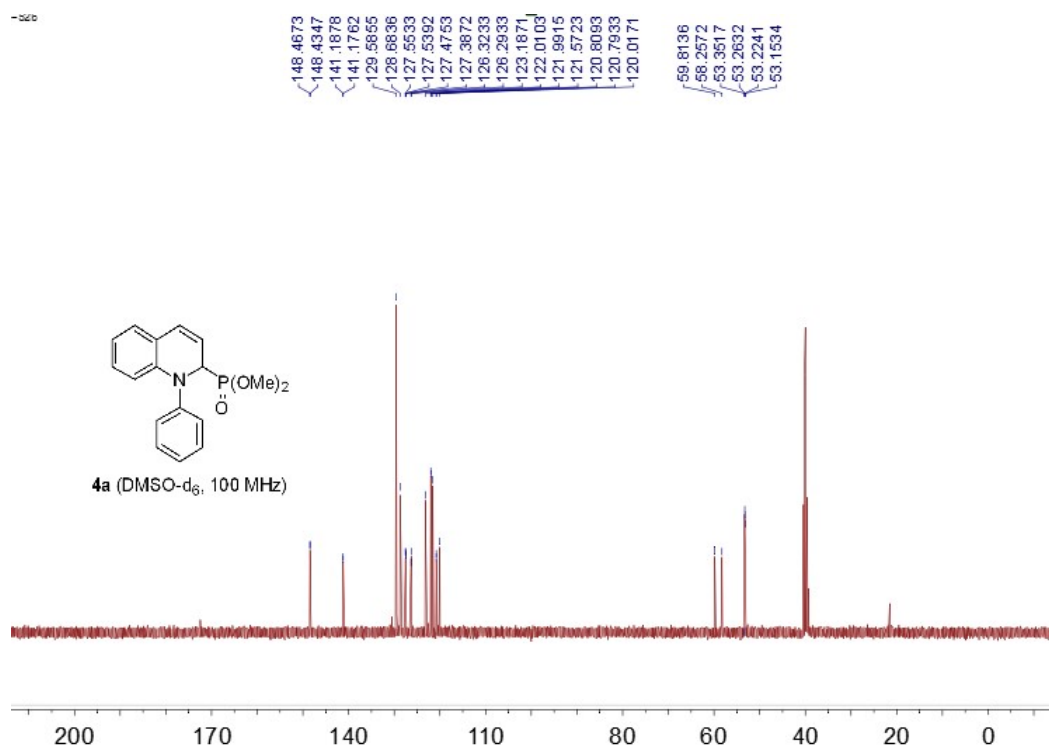

# Compound 4b

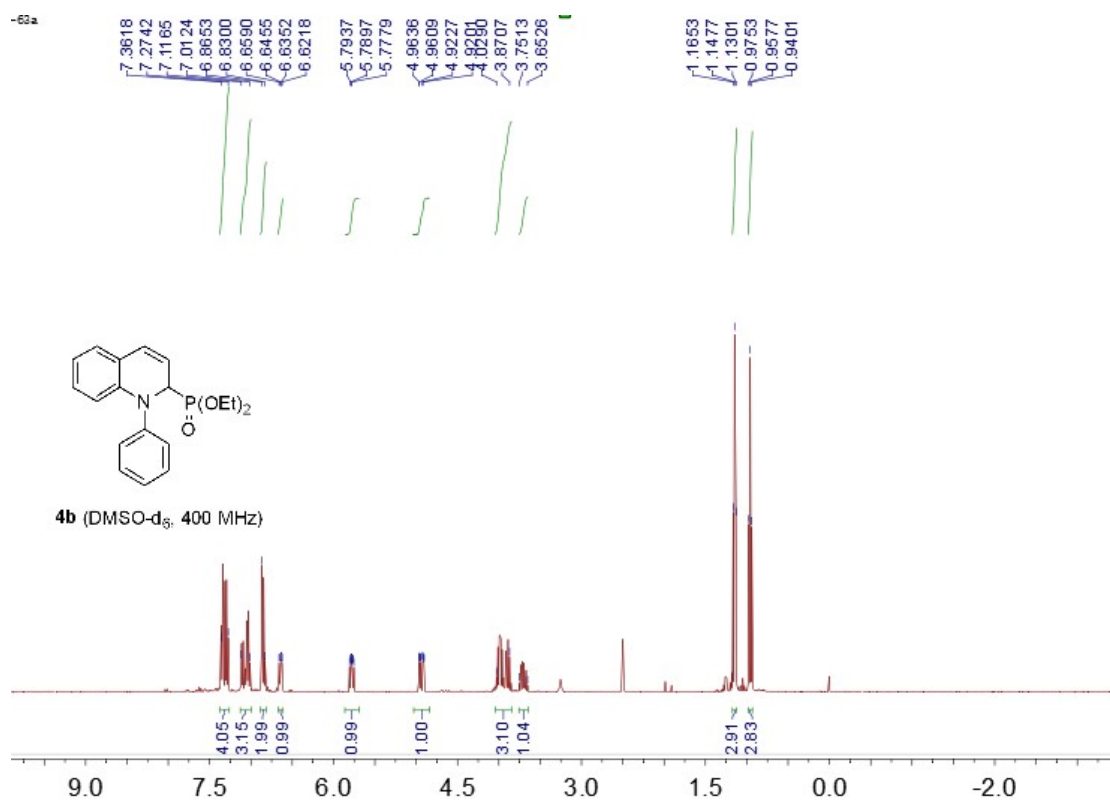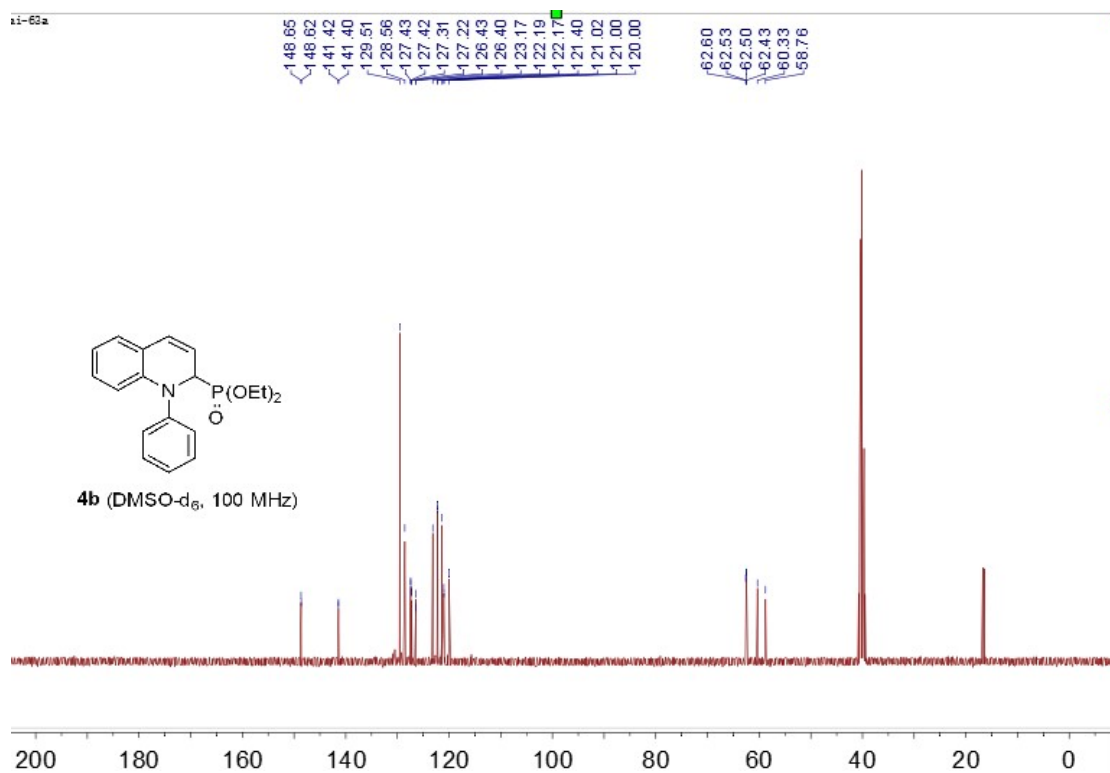

# Compound 4c

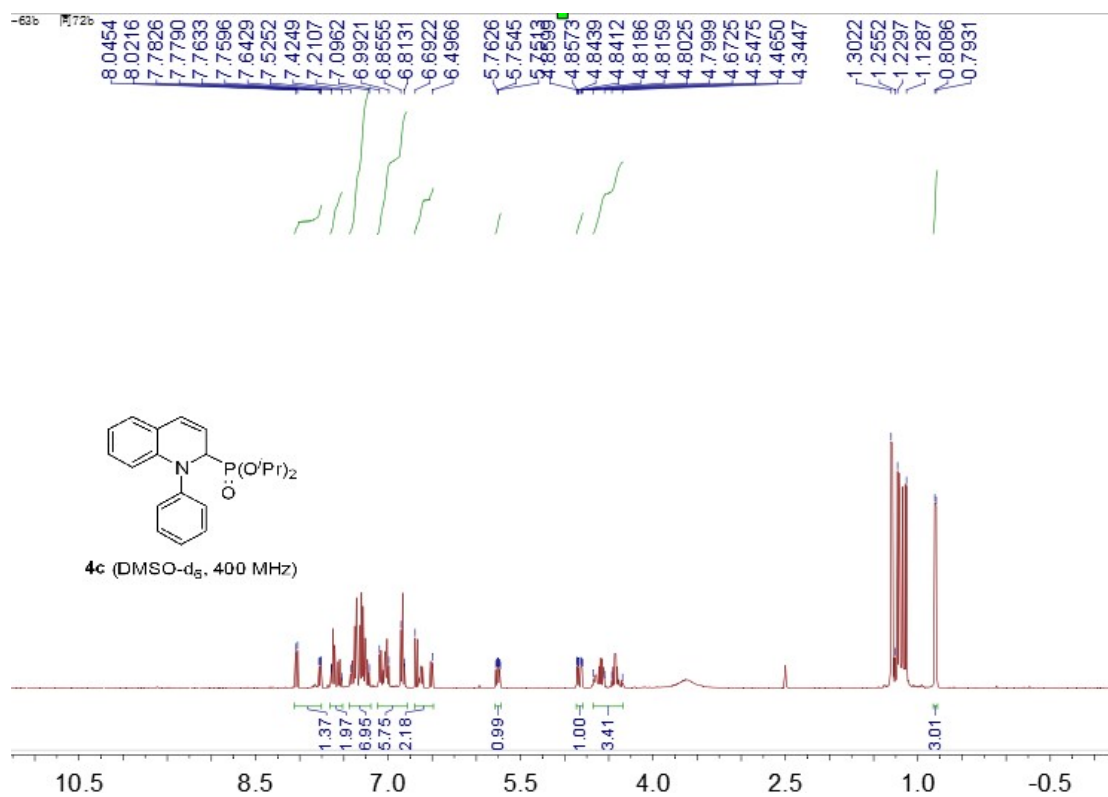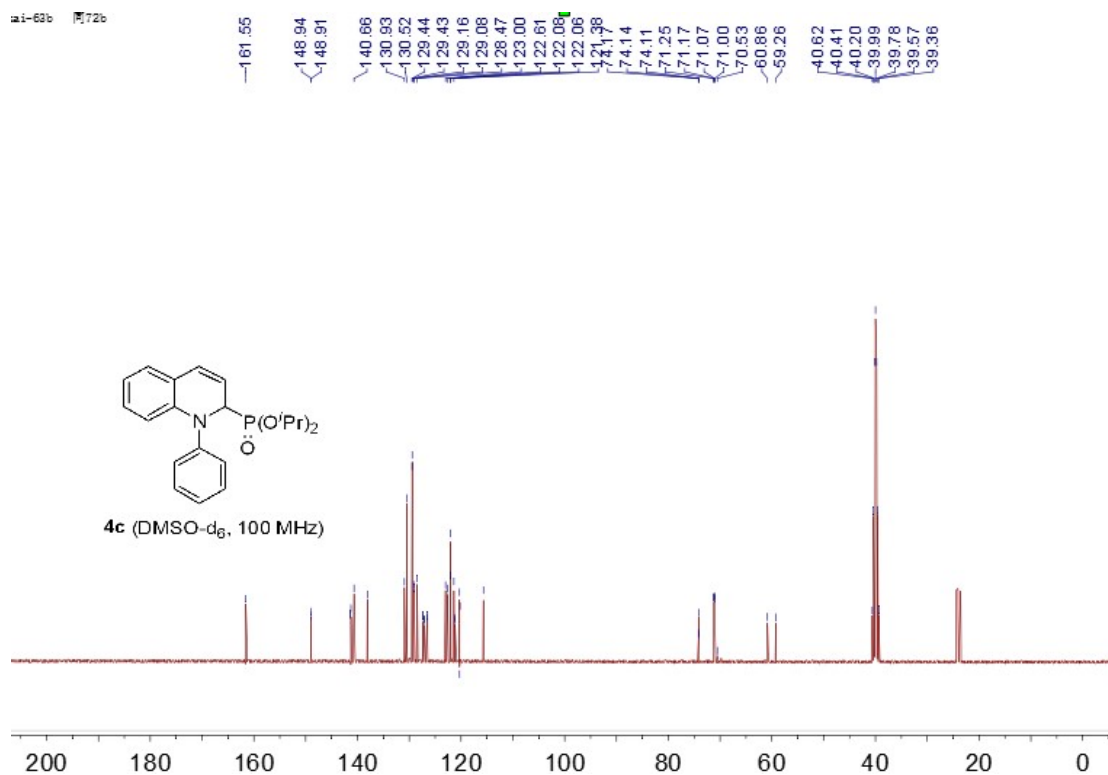

# Compound 4d

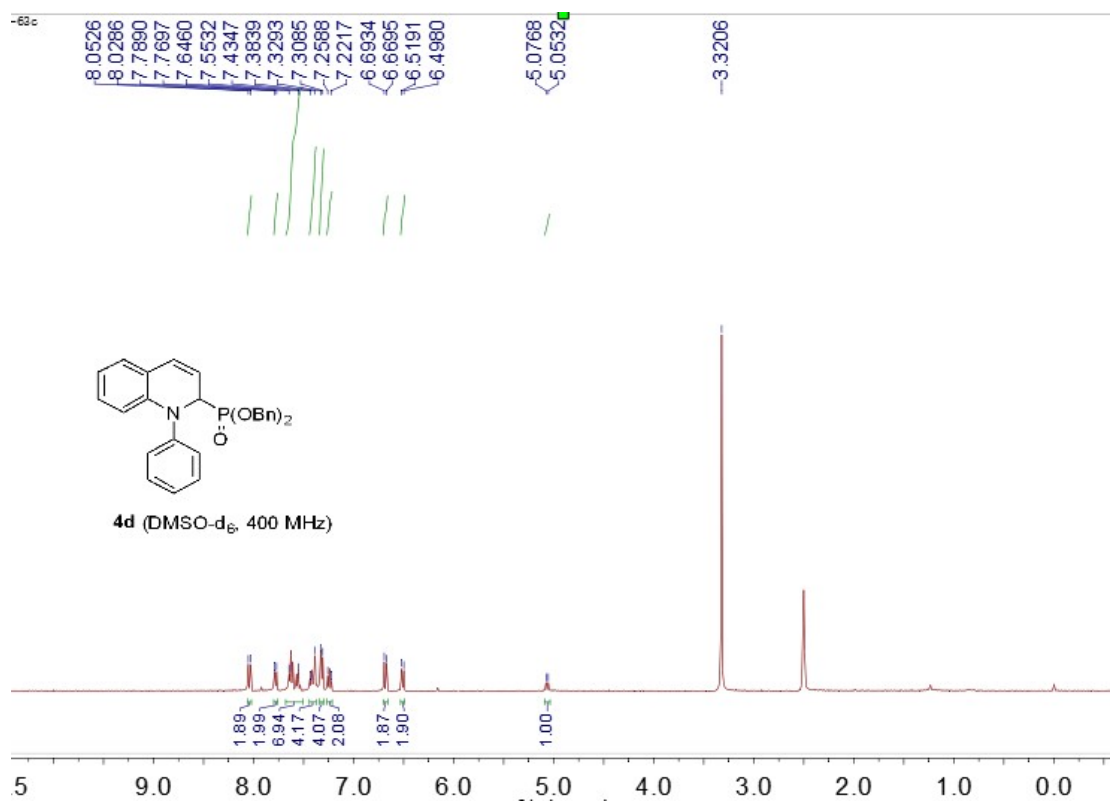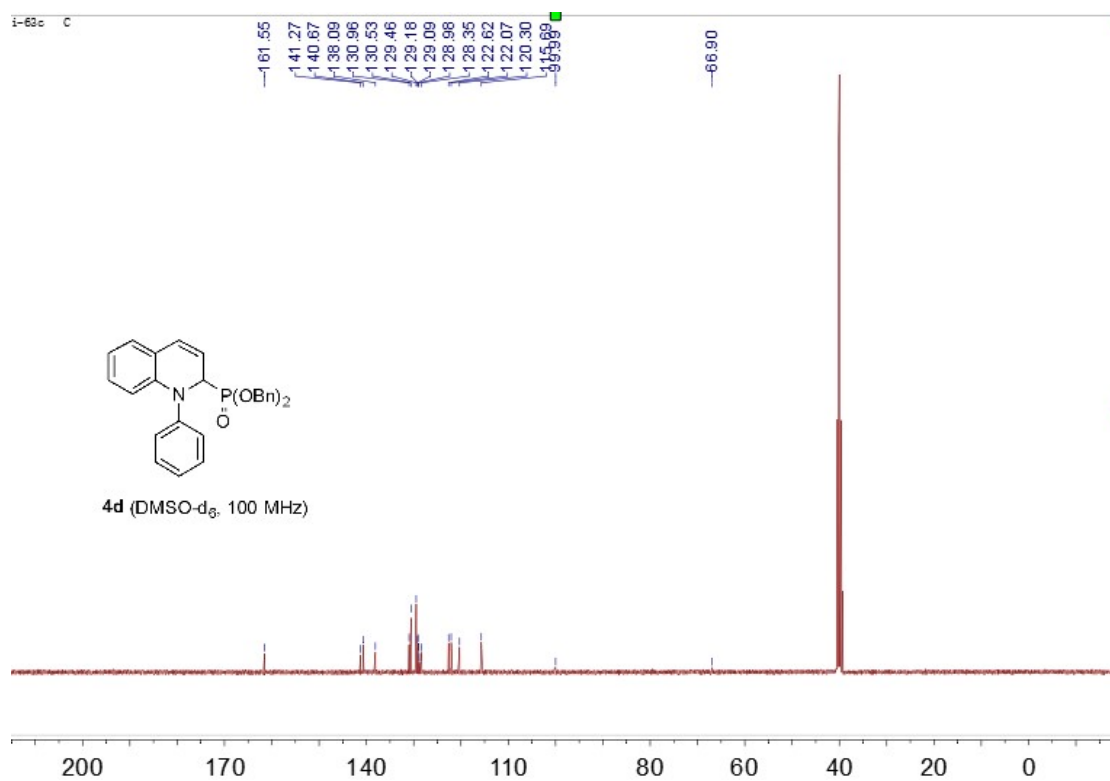

# Compound 4f

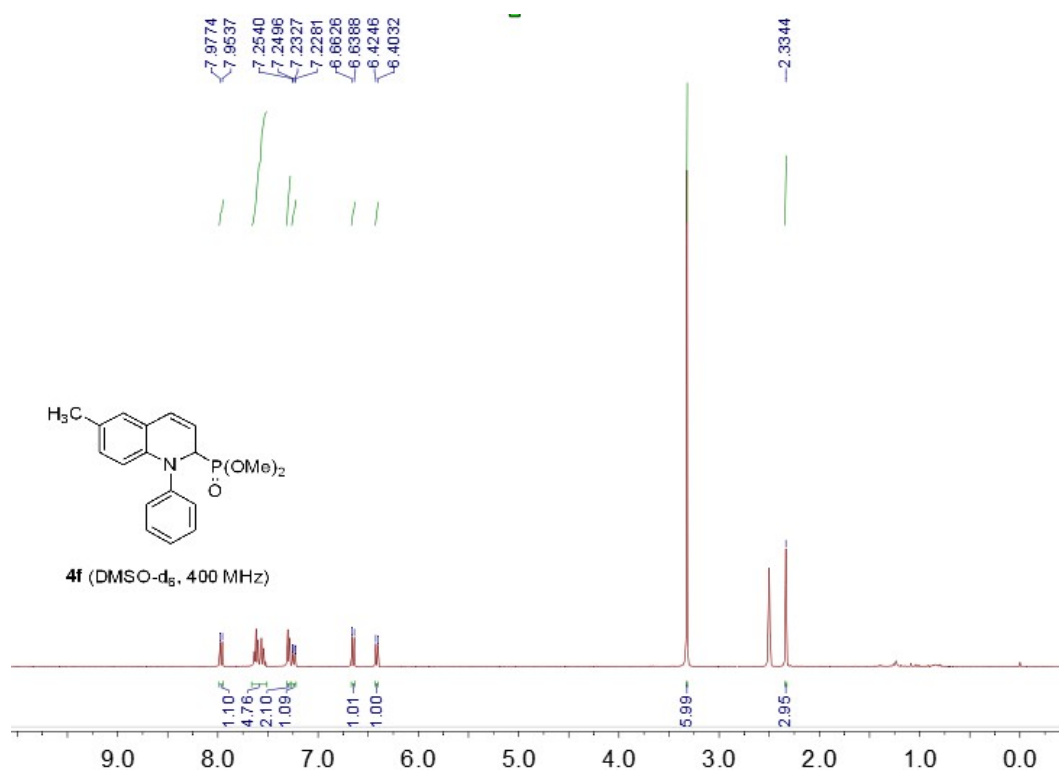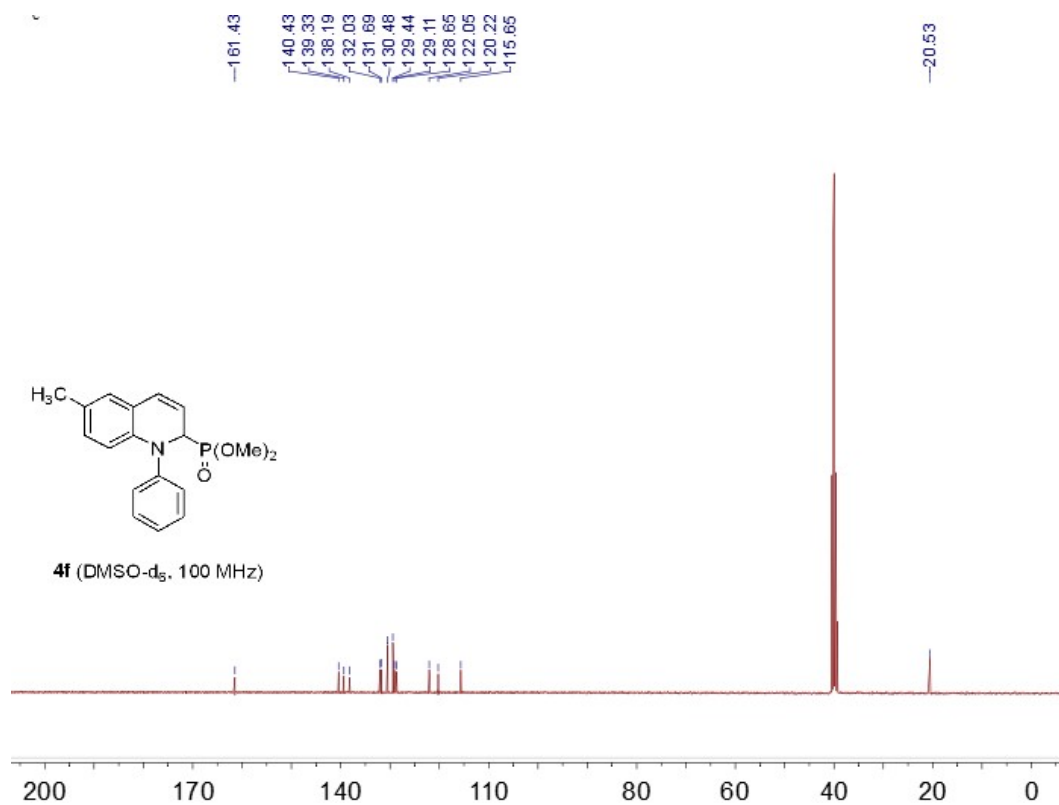

# Compound 4g

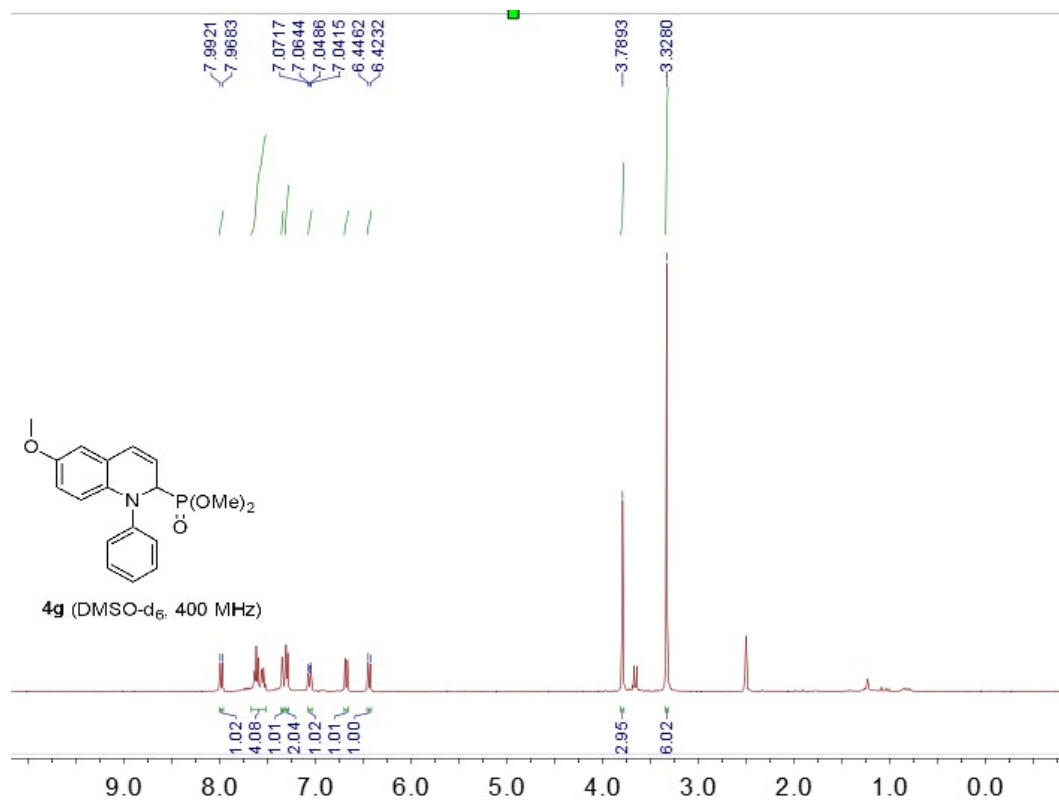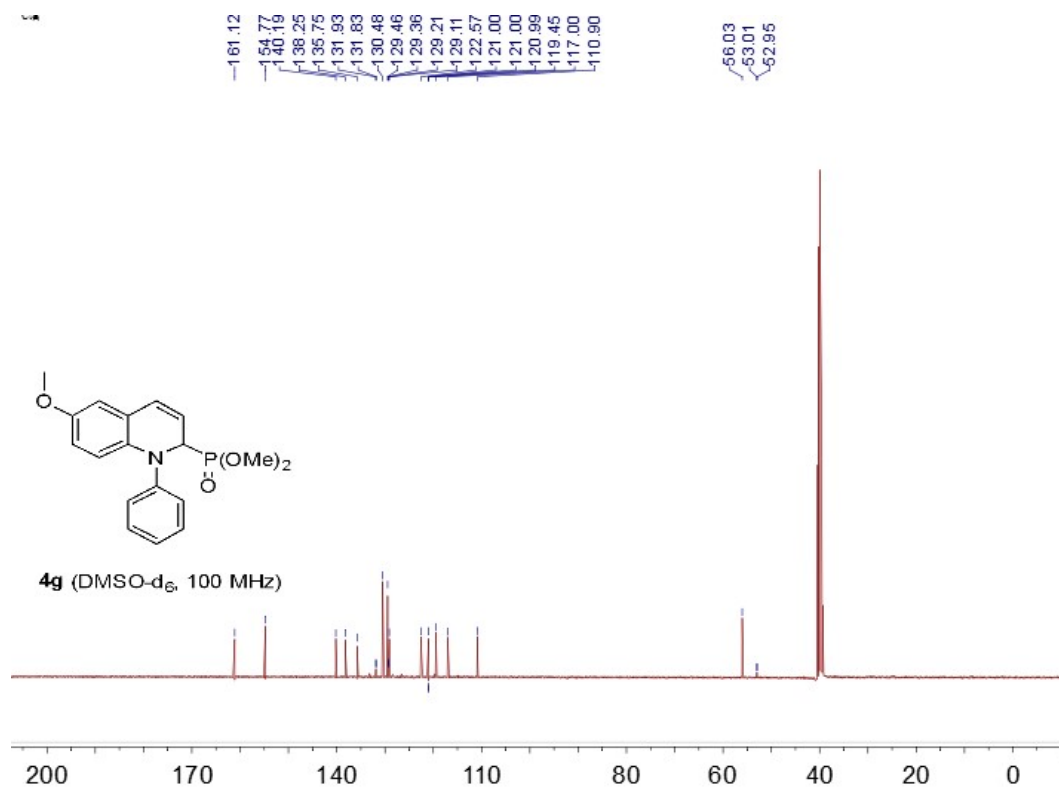

# Compound 4h

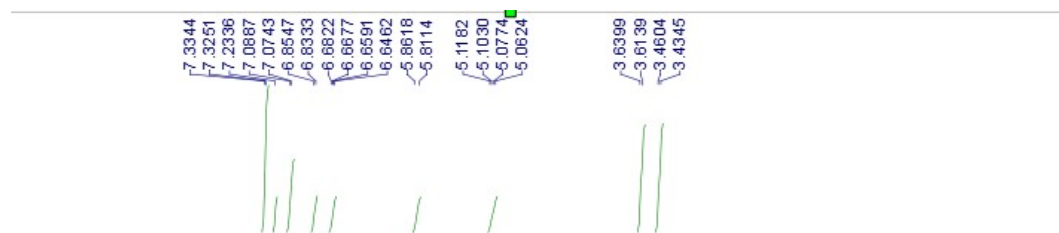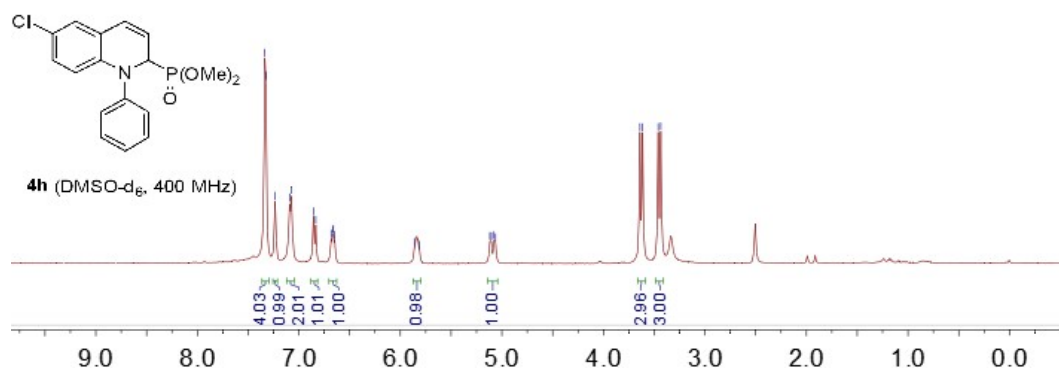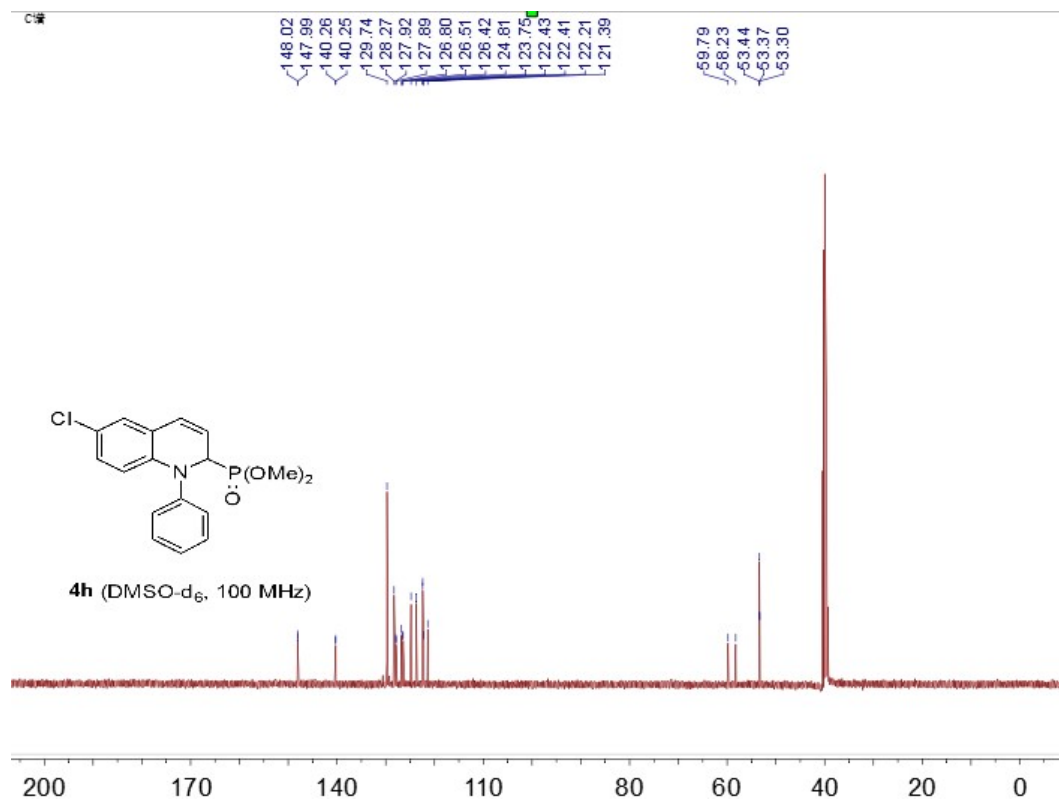

# Compound 4i

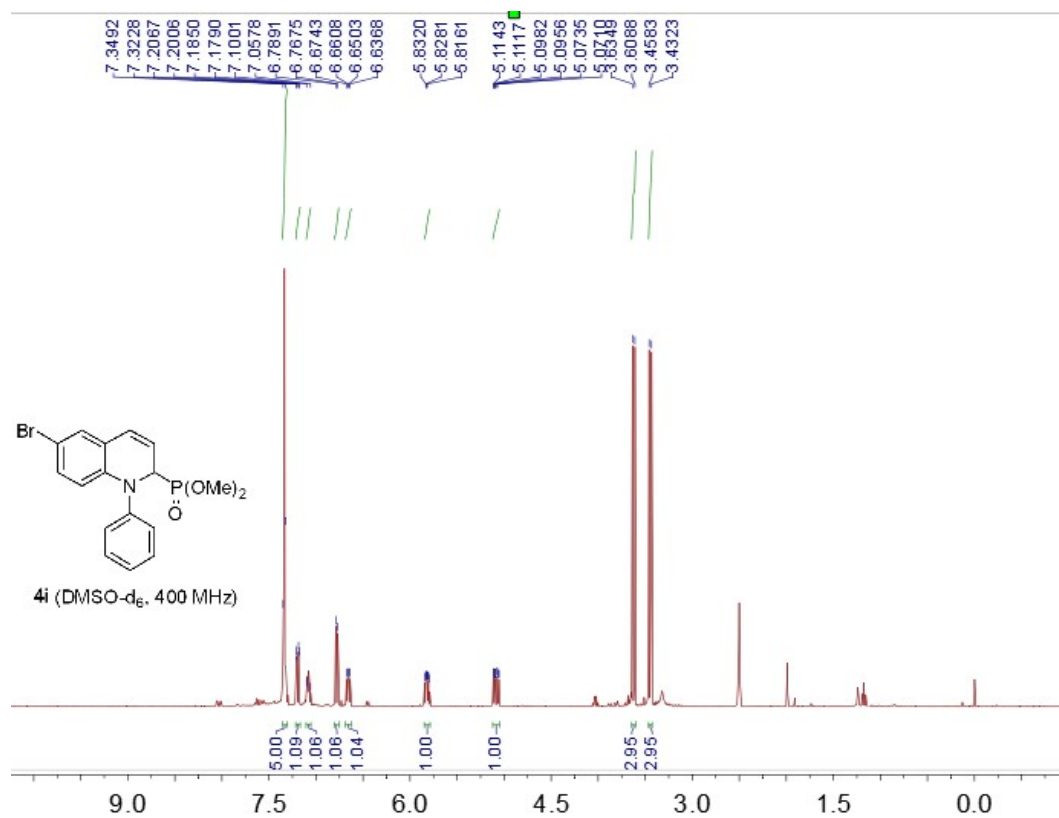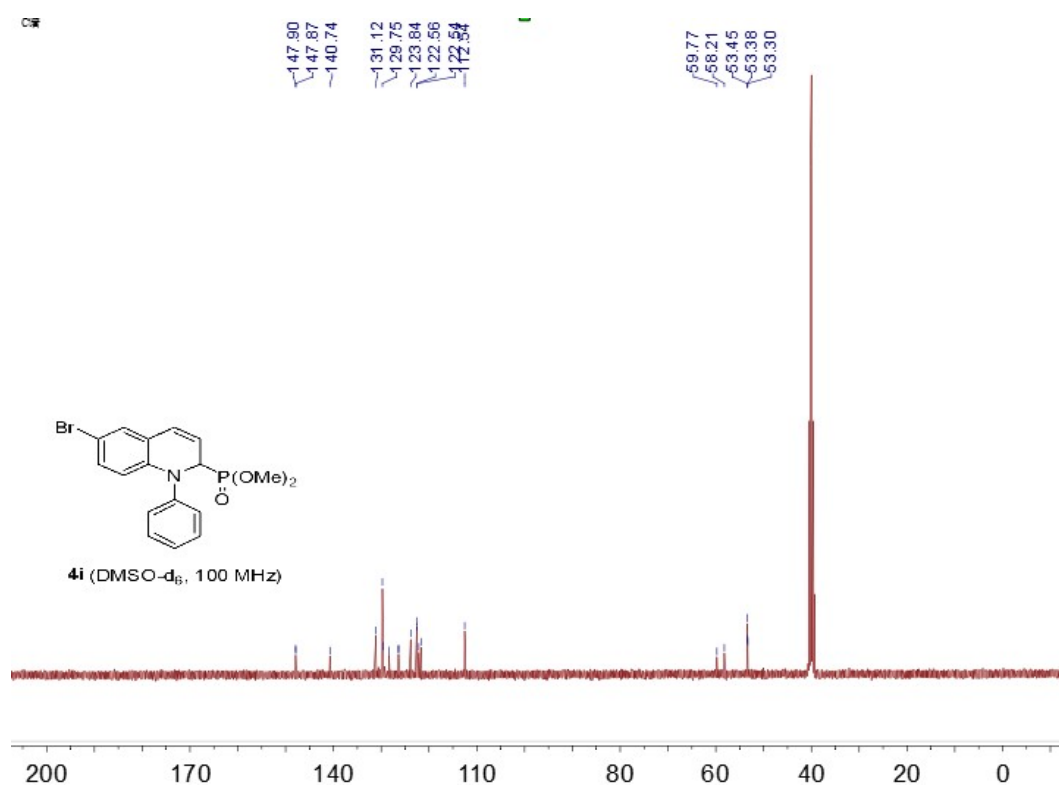



# Compound 4j

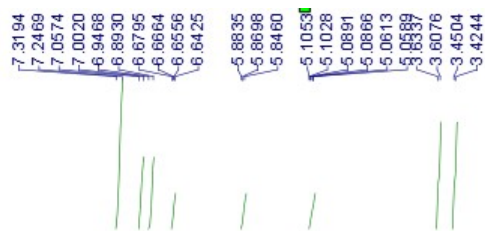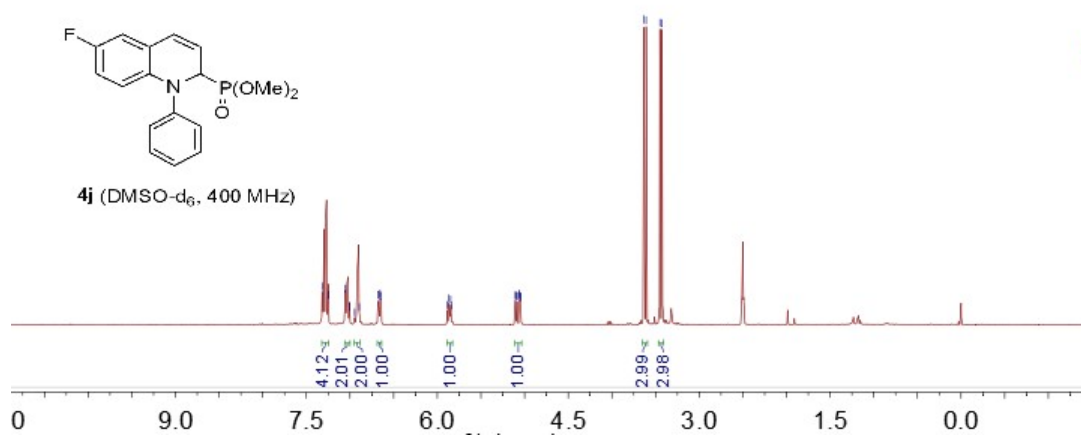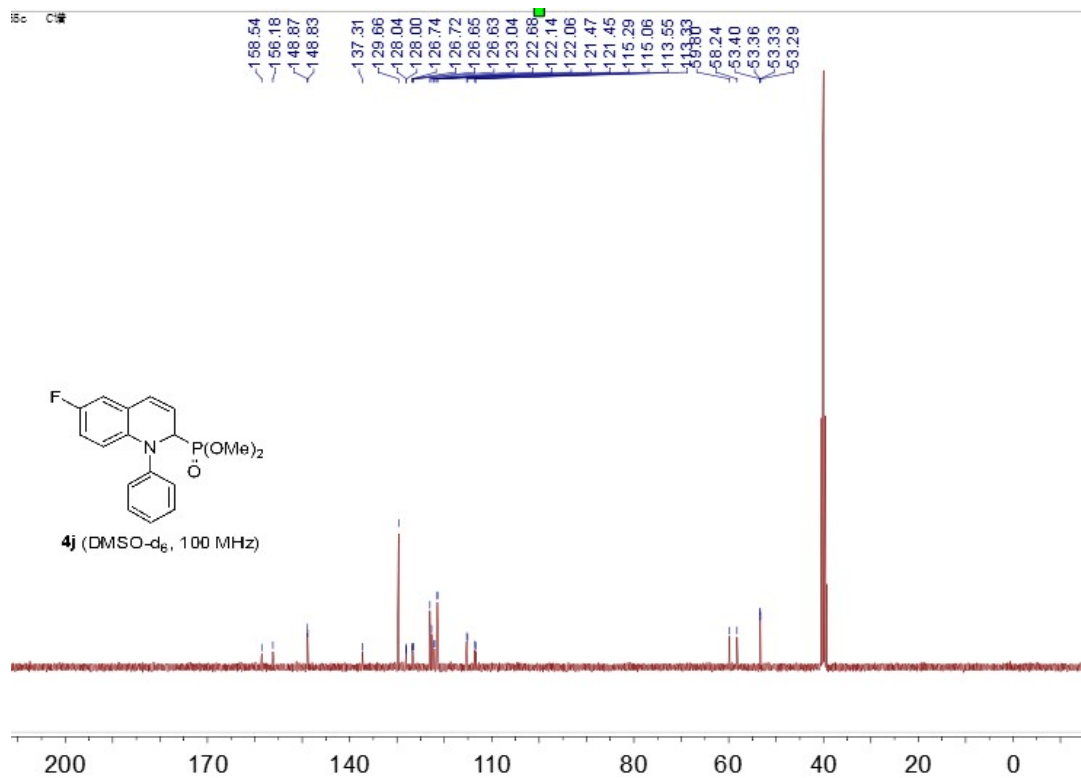

# Compound 4k

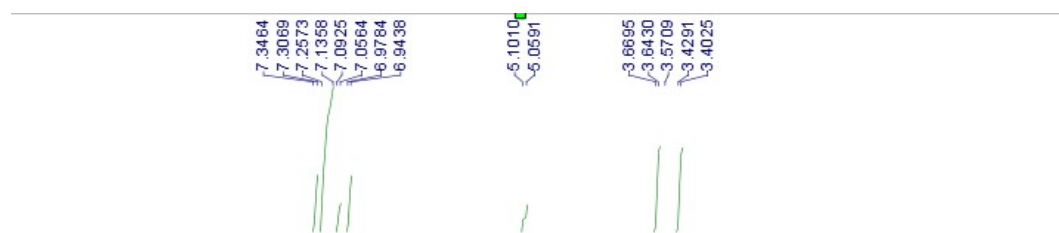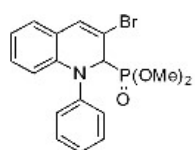

4k (DMSO-d<sub>6</sub>, 400 MHz)

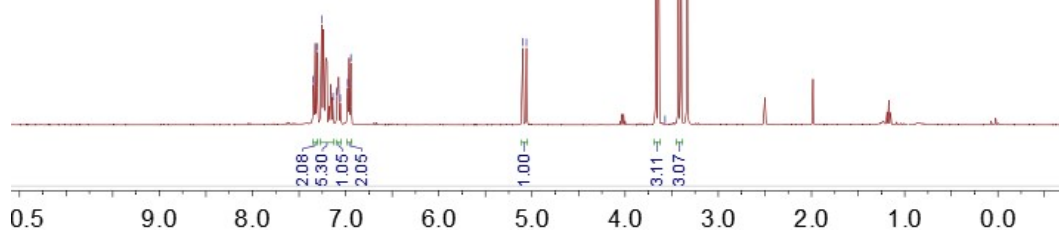

66a C<sup>13</sup>

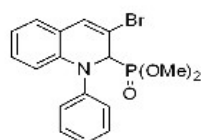

4k (DMSO-d<sub>6</sub>, 100 MHz)

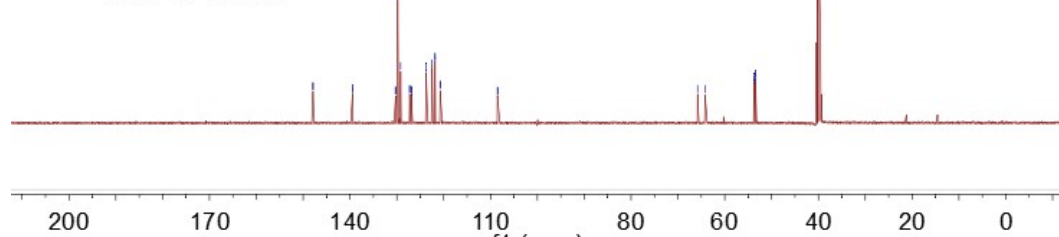

# Compound 4I

1H

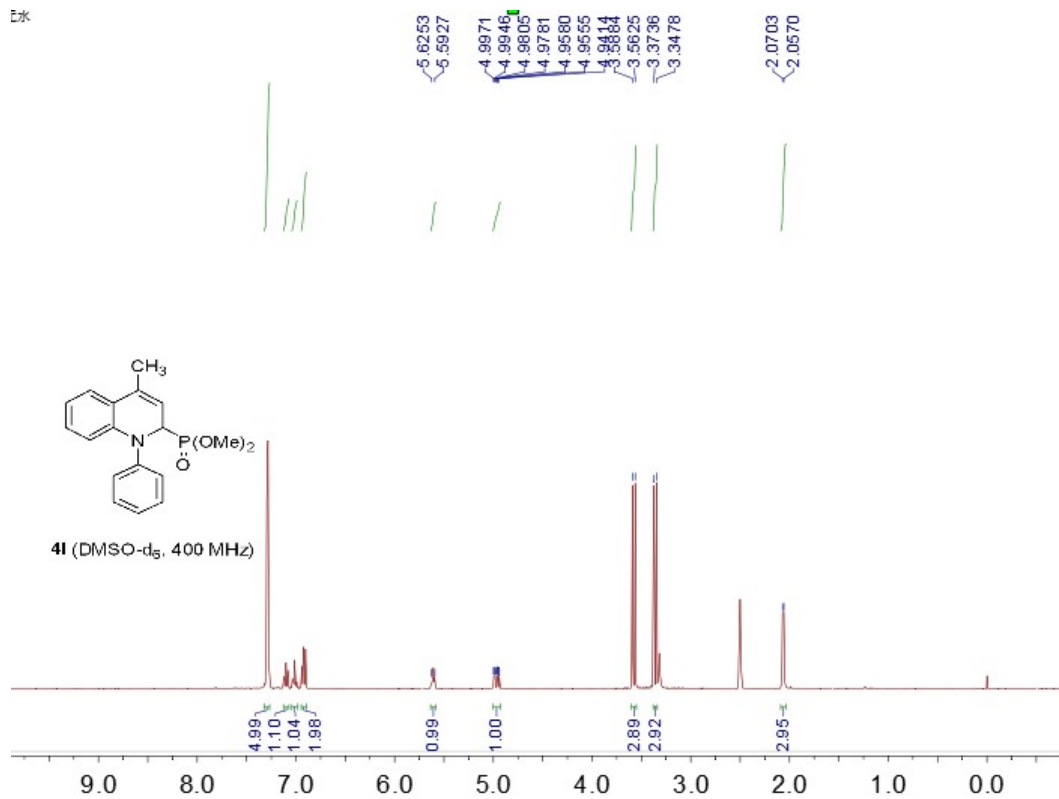

13C

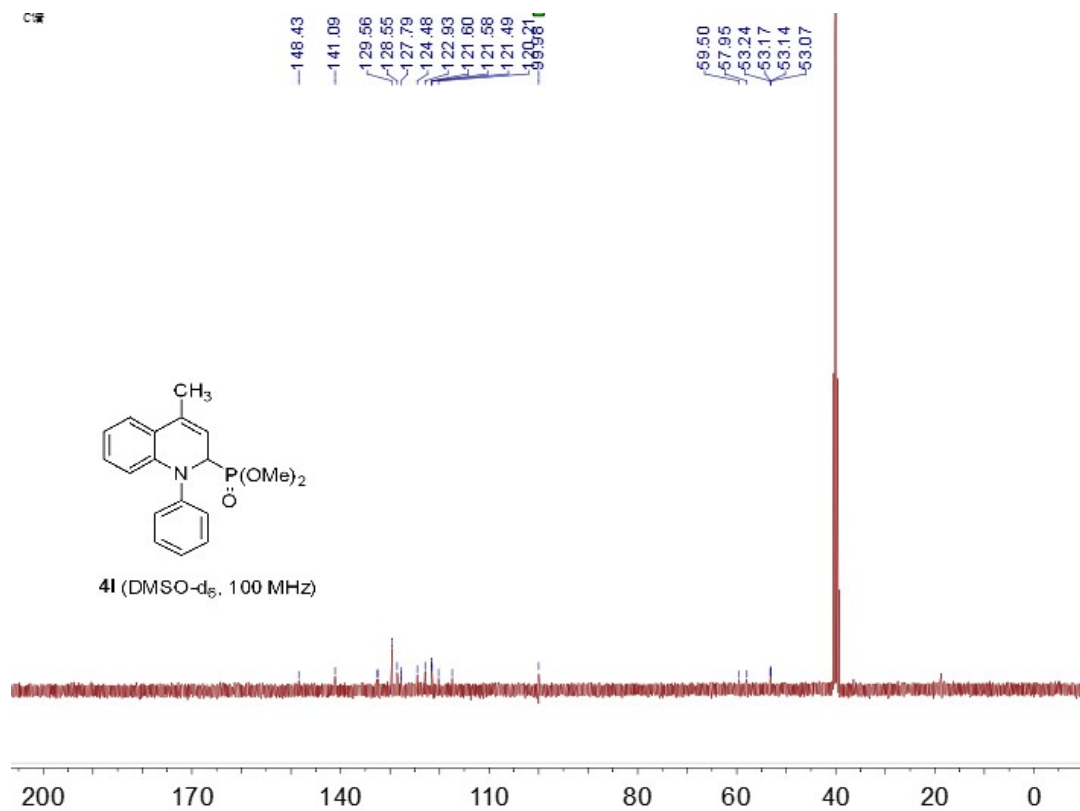

# Compound 4m

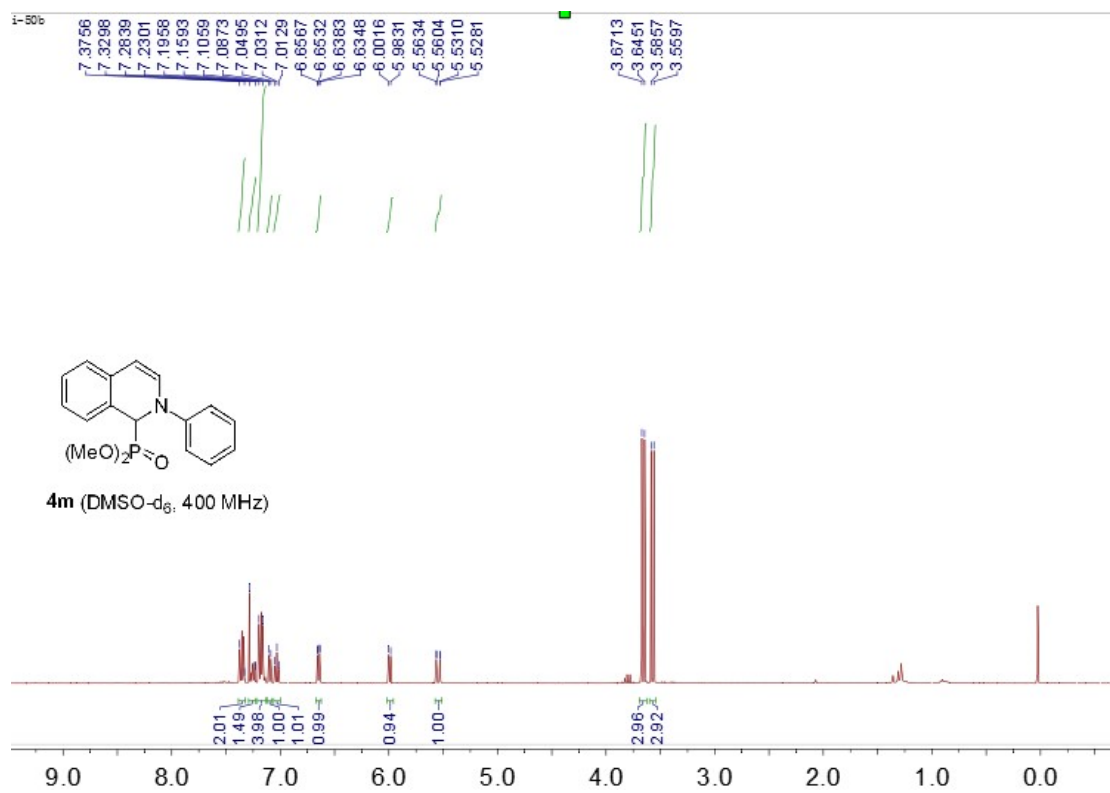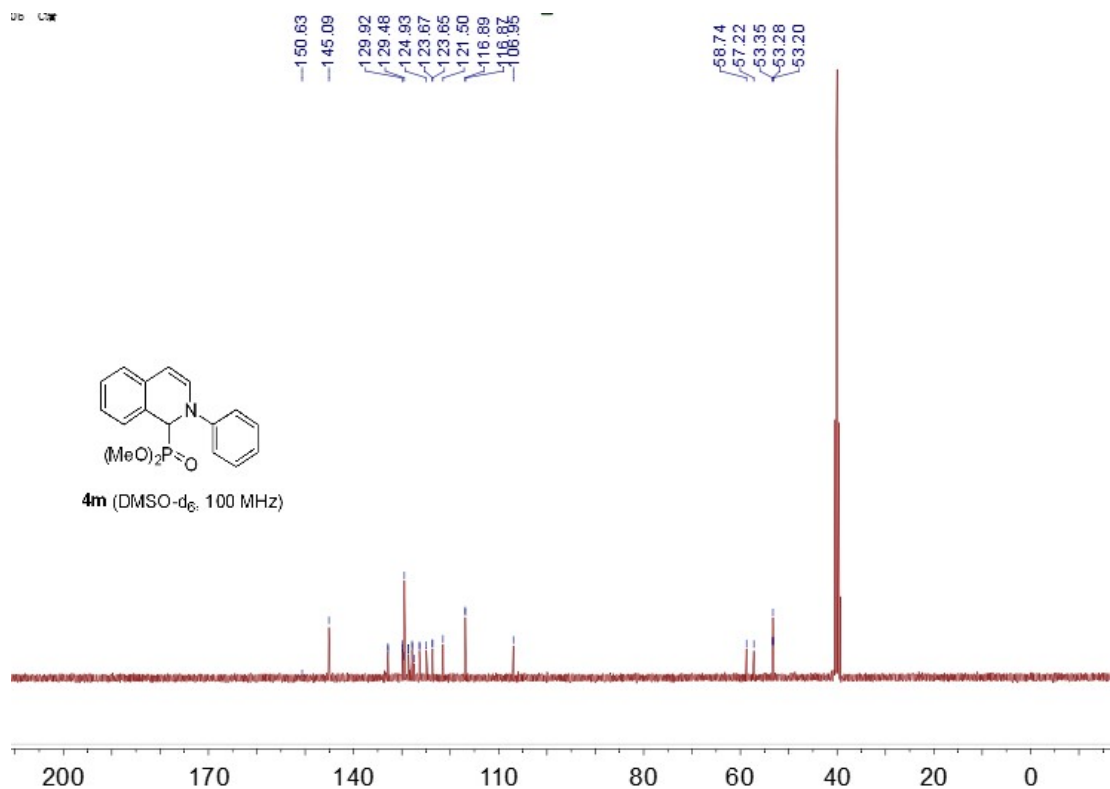

# Compound 4n

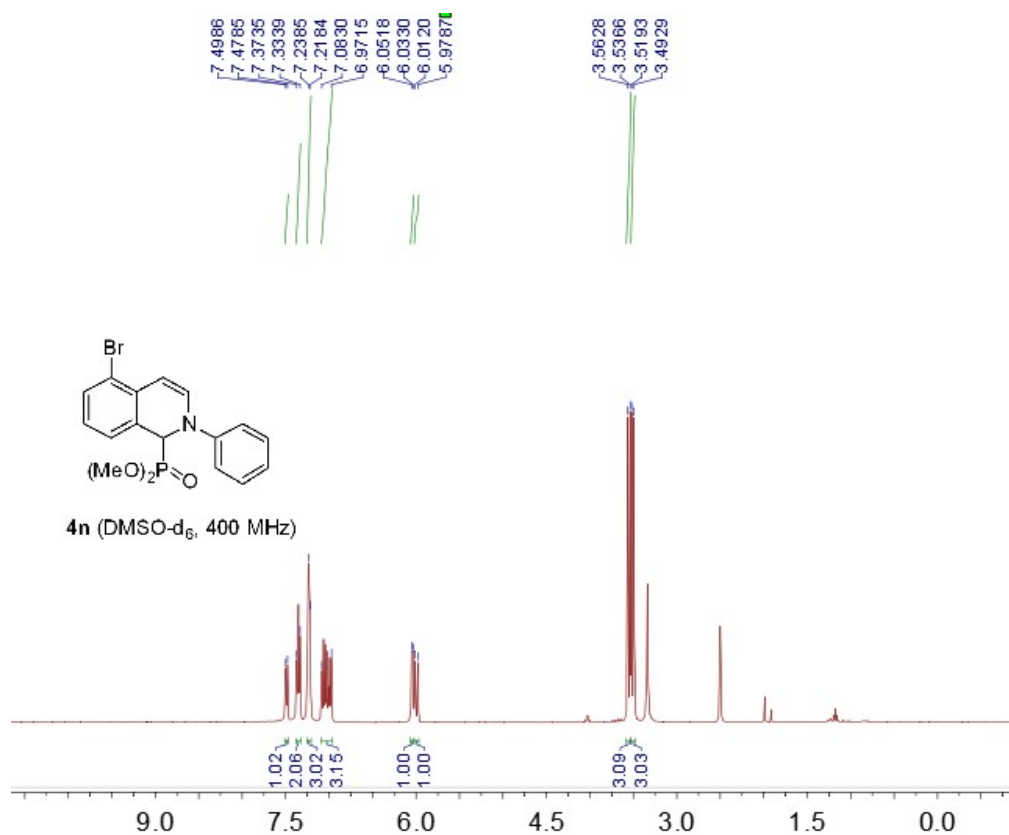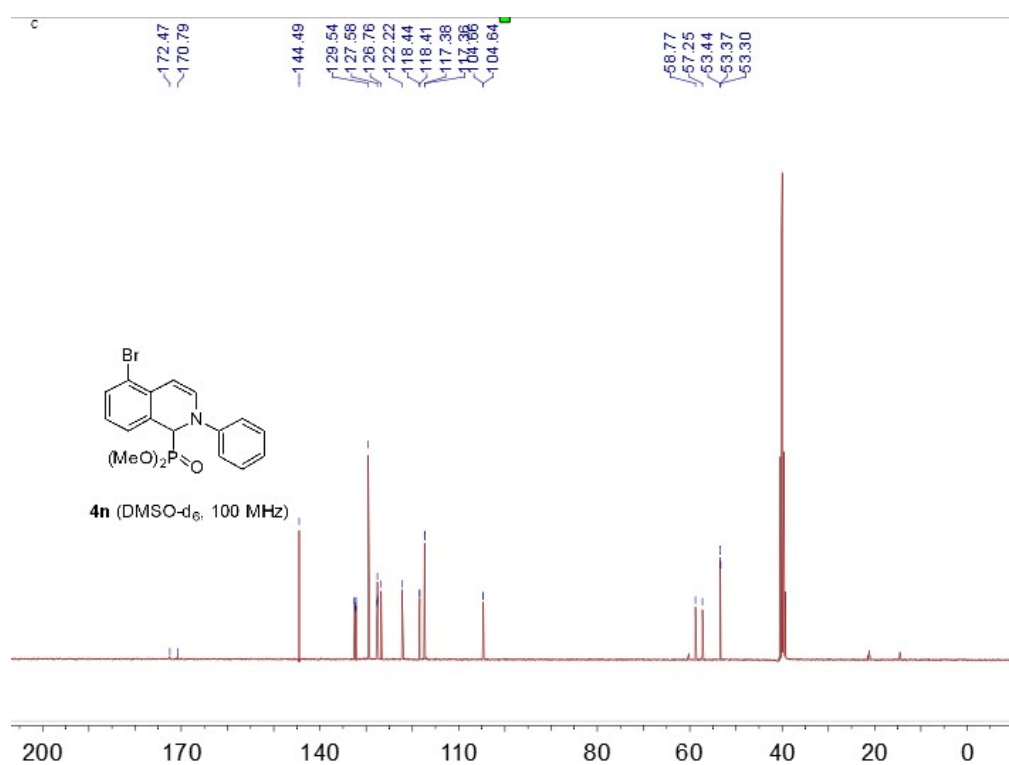

# Compound 4o

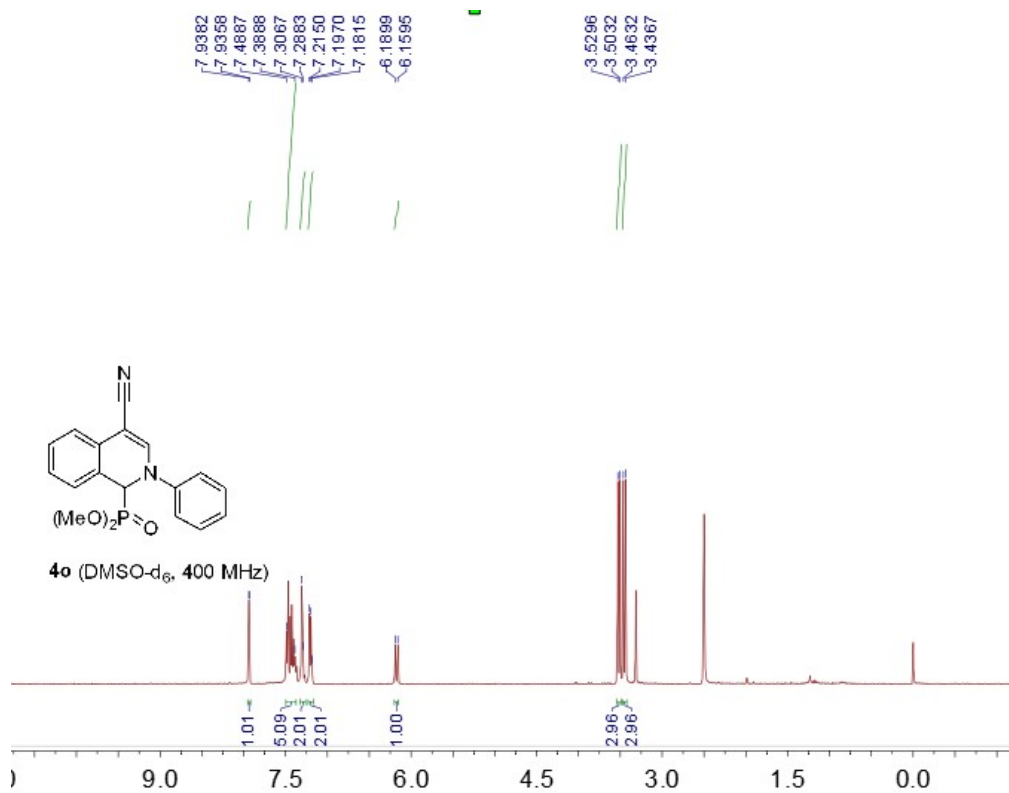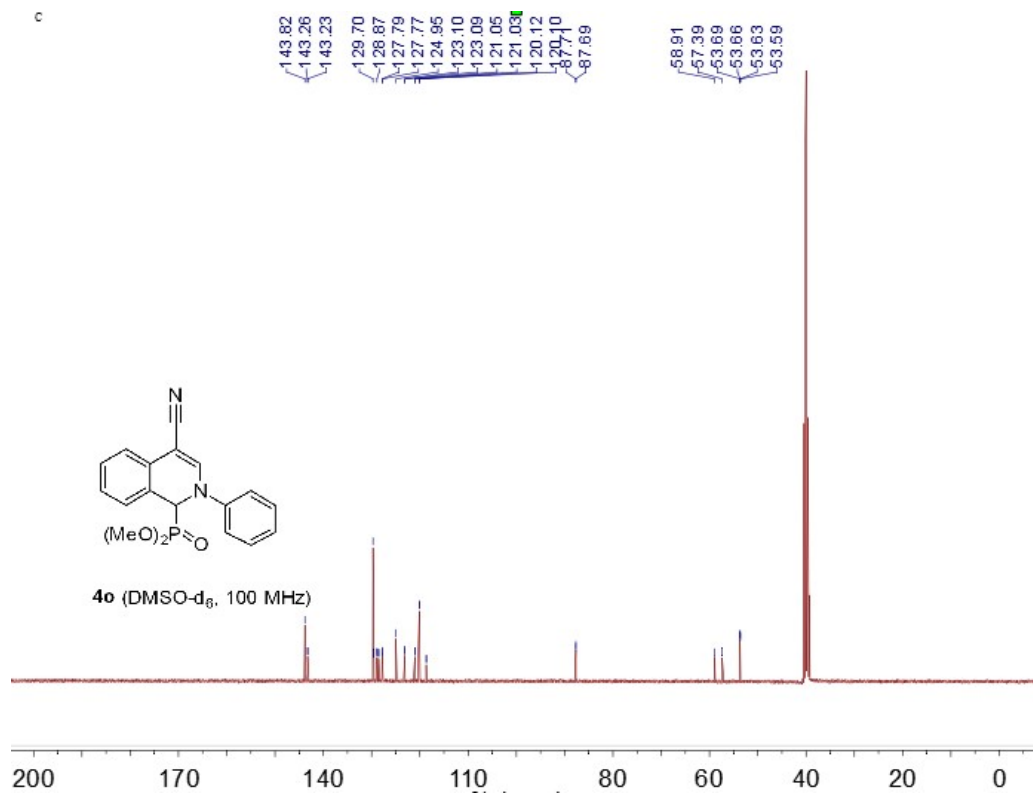

# Compound 4p

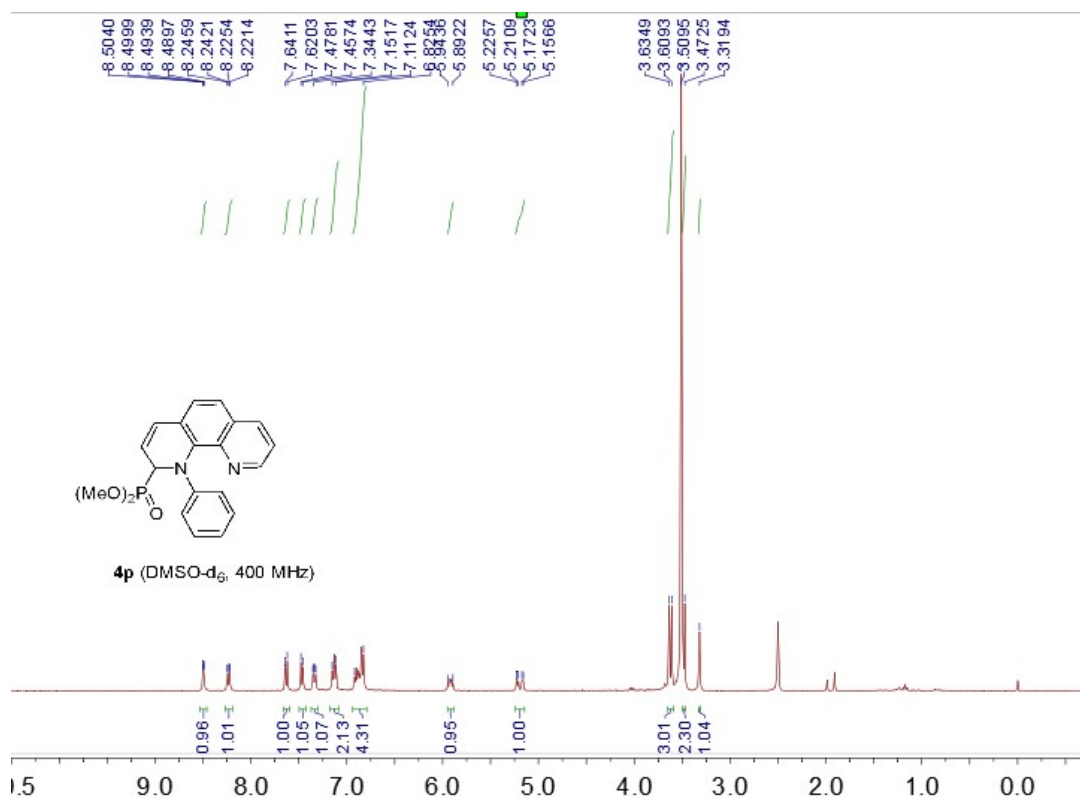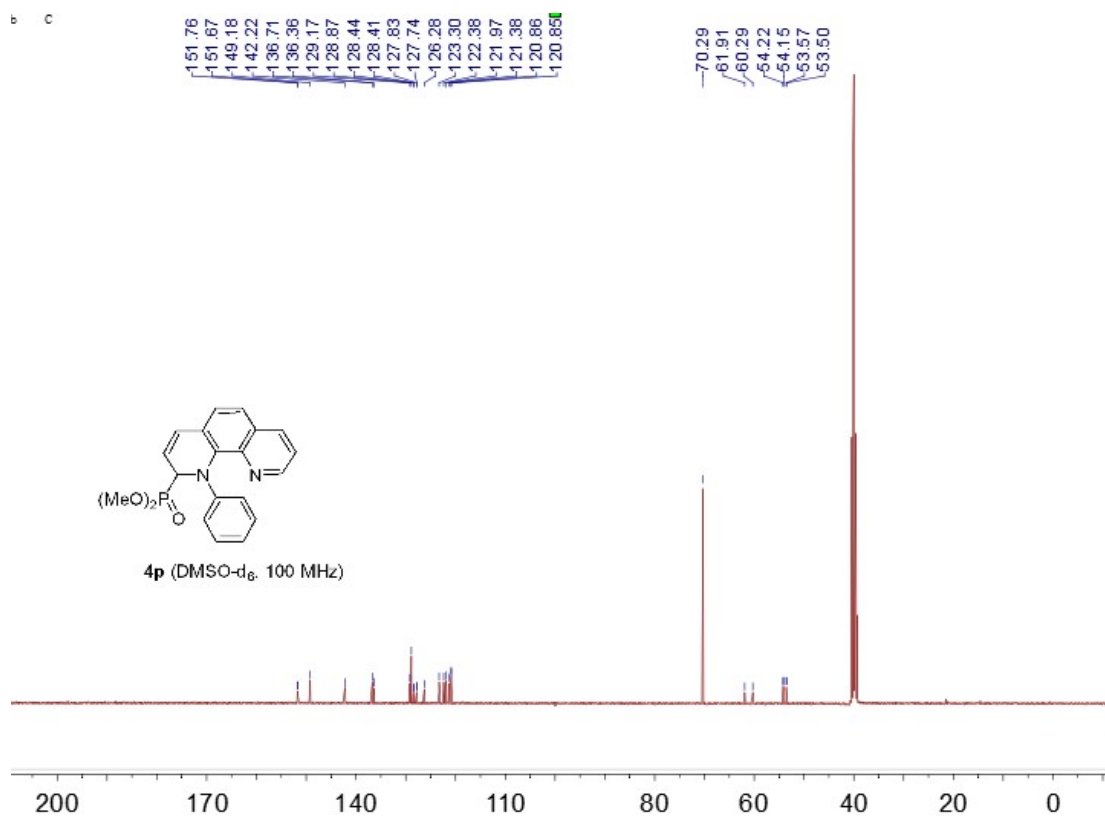

# Compound 4q

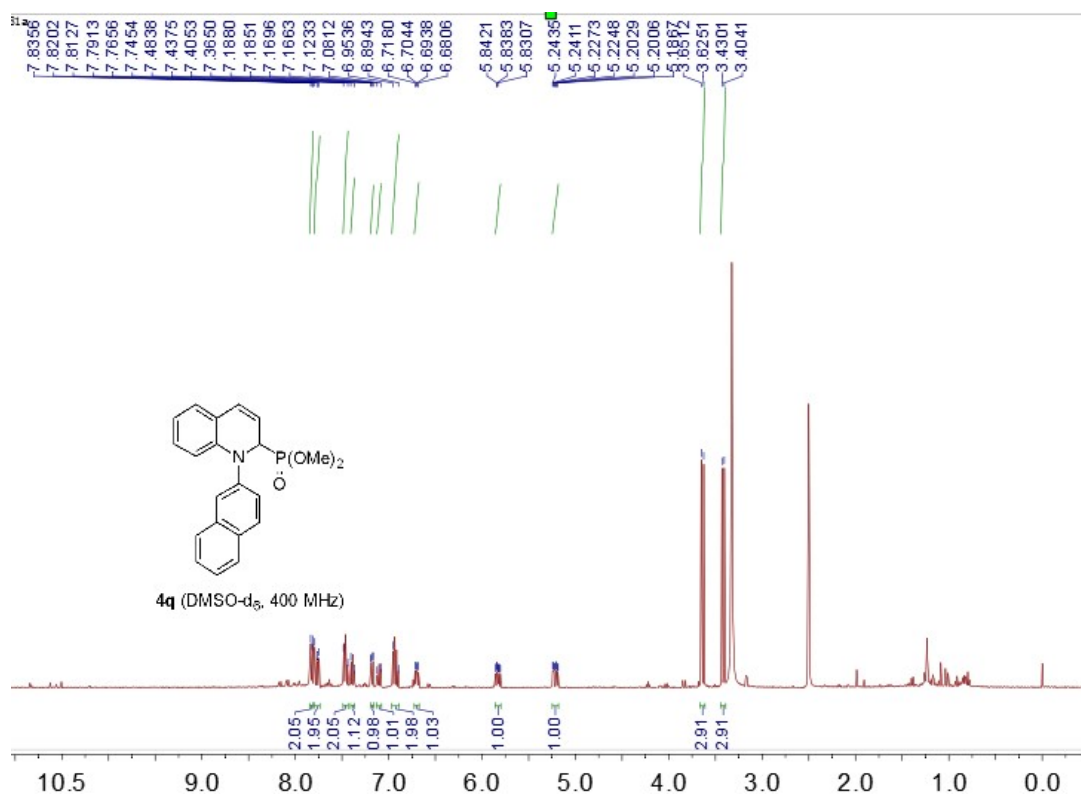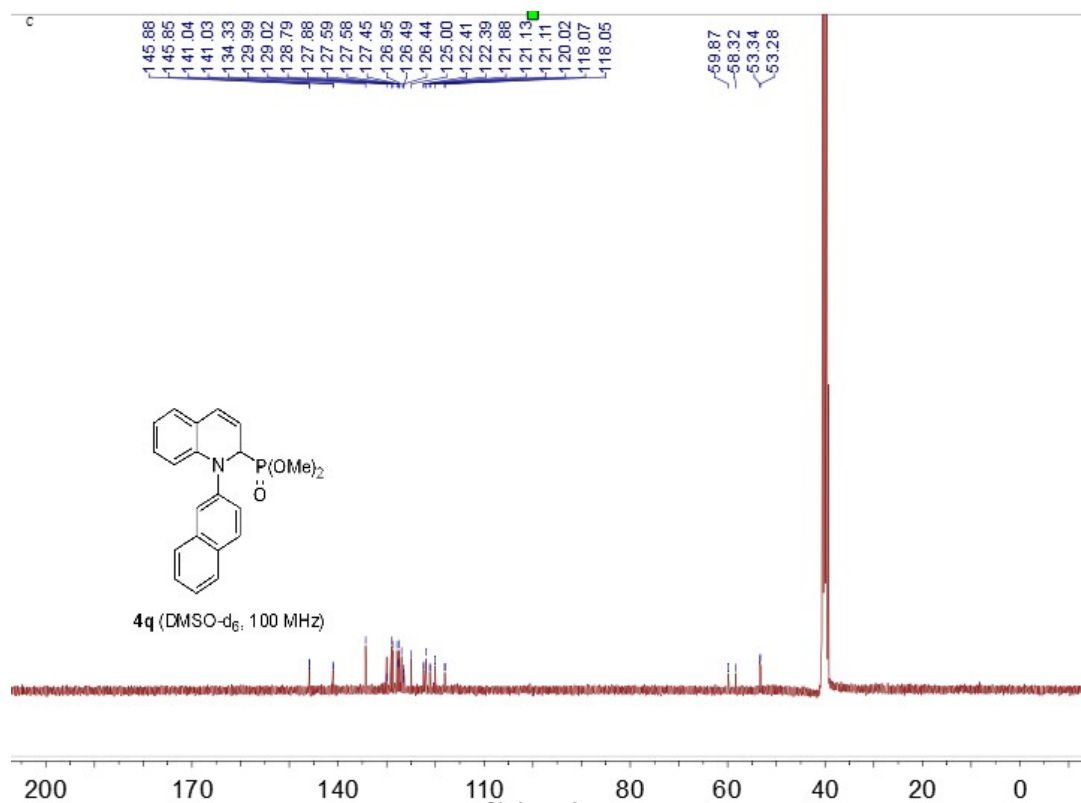



# Compound 4r

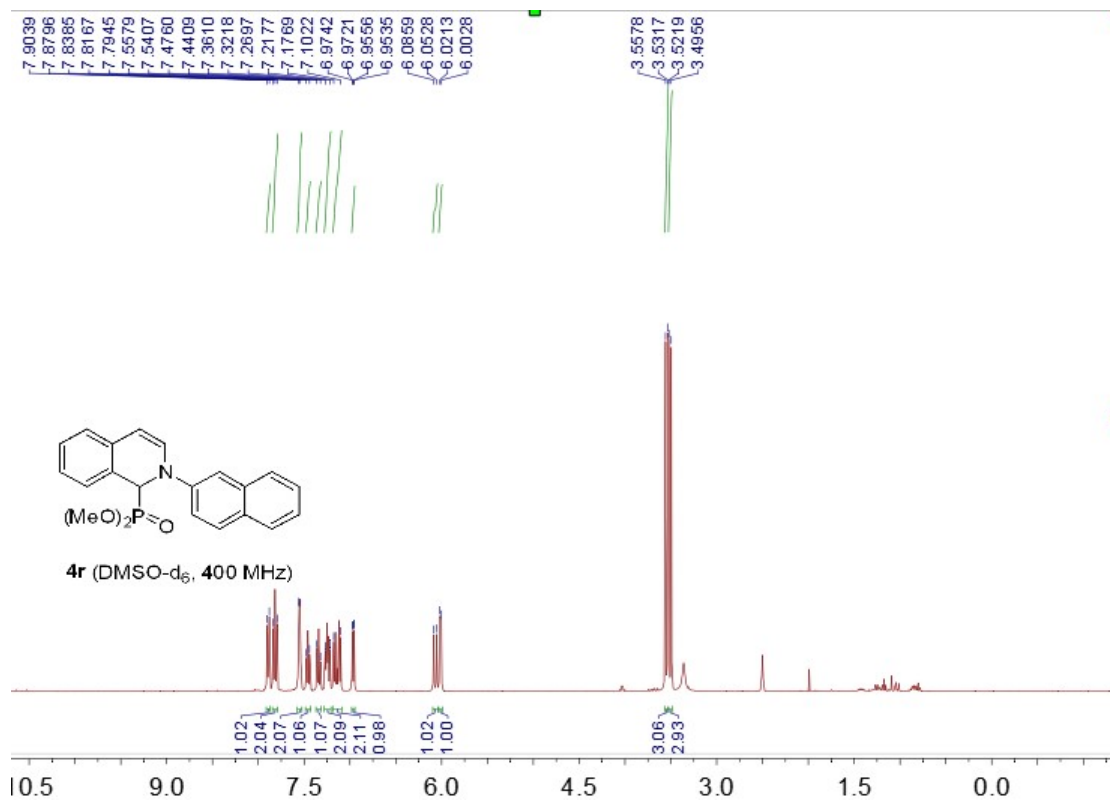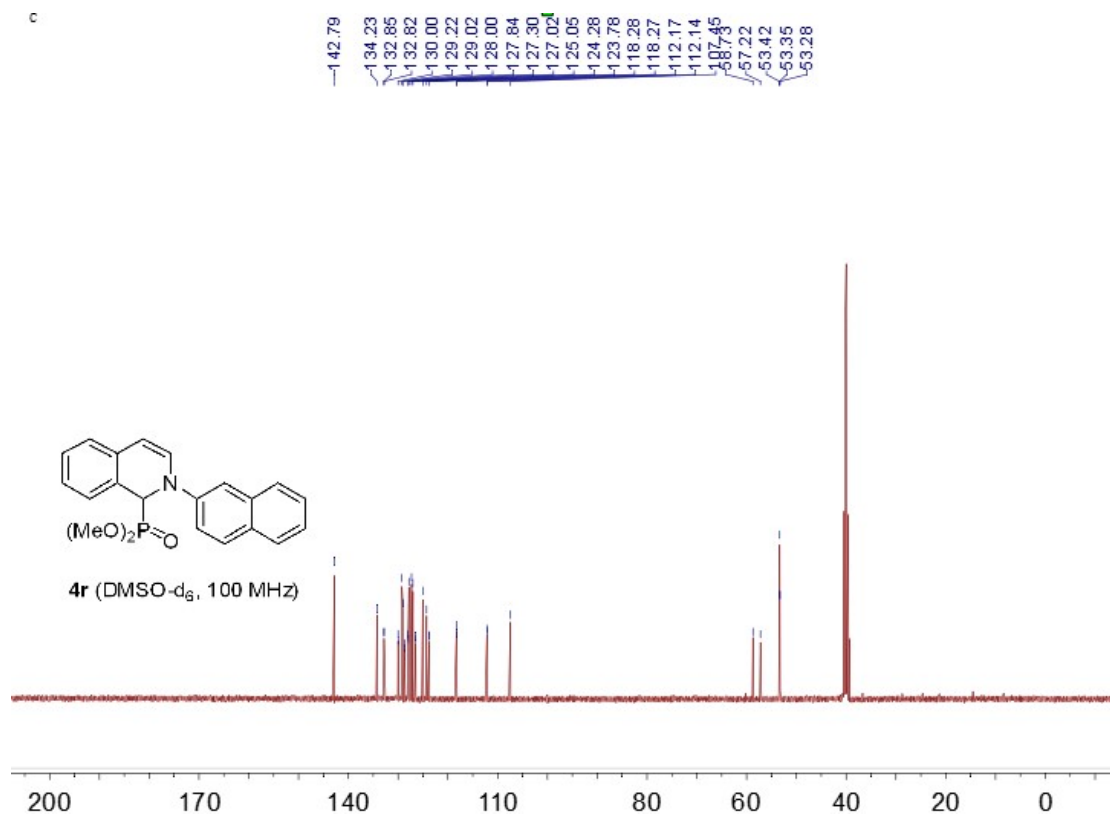

# Compound 4s

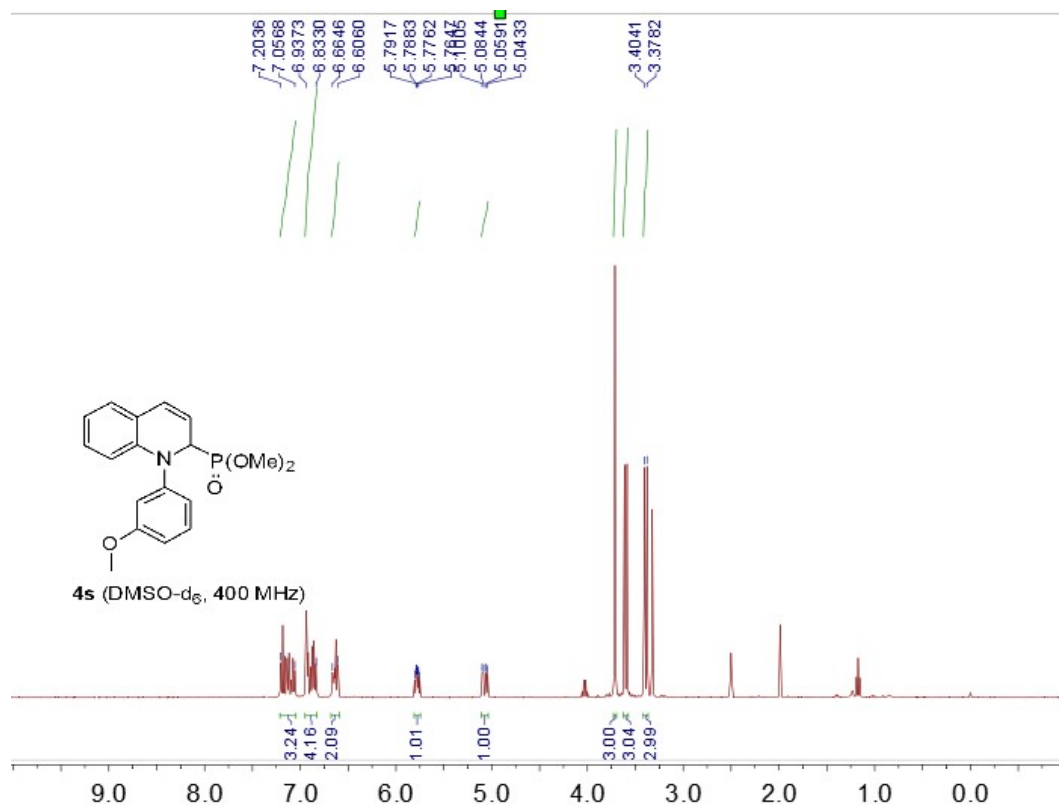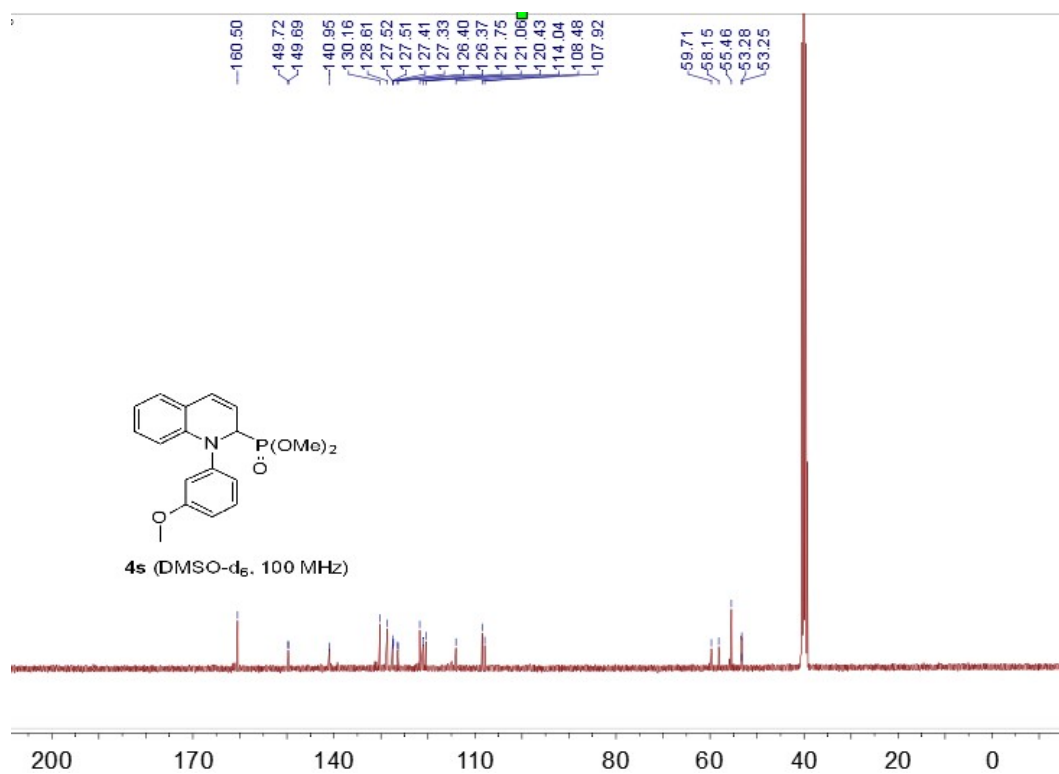

# Compound 4t

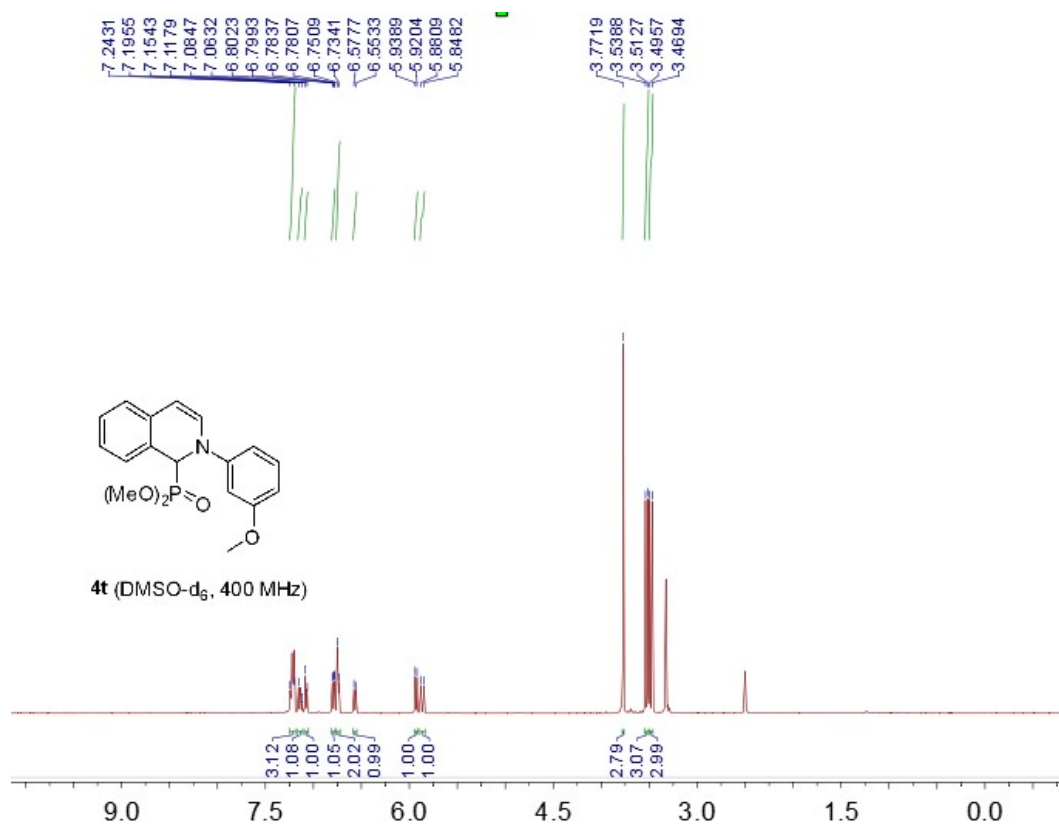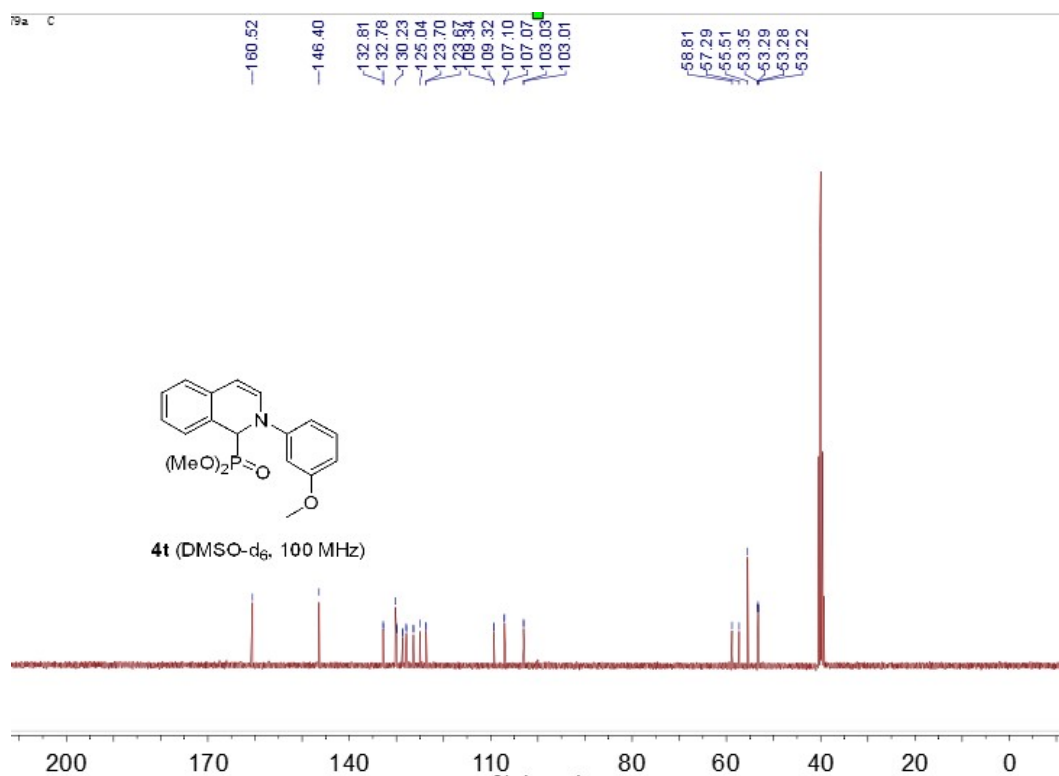

# Compound 4u

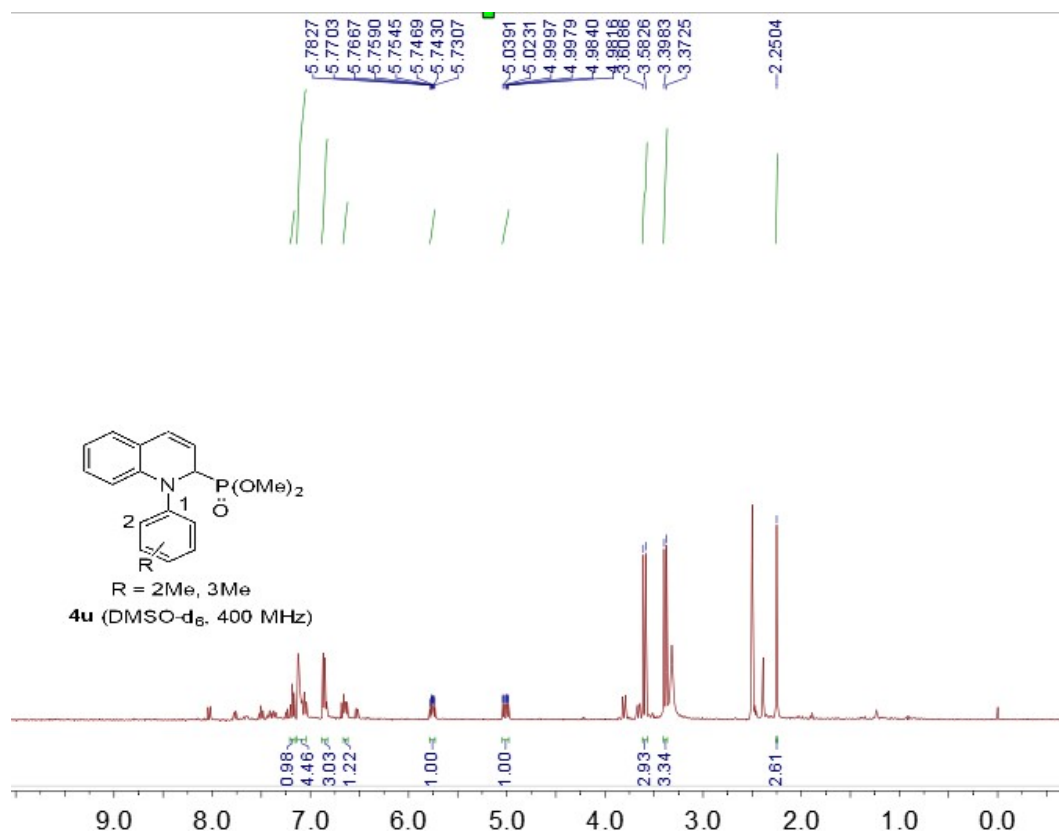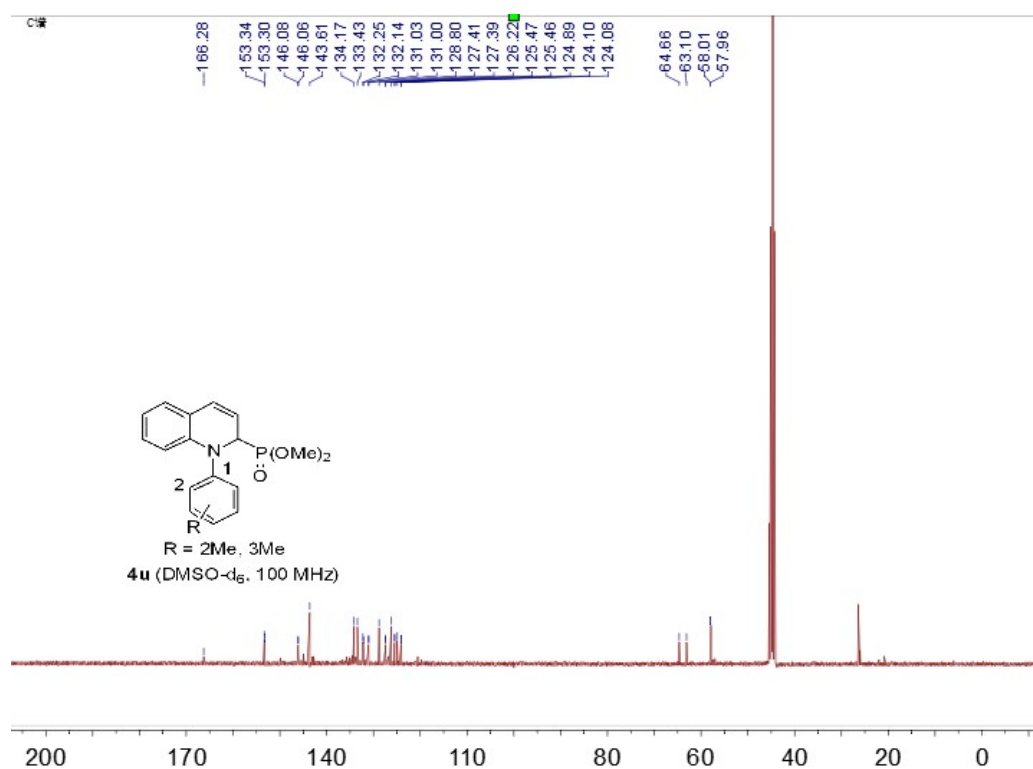

# Compound 4v

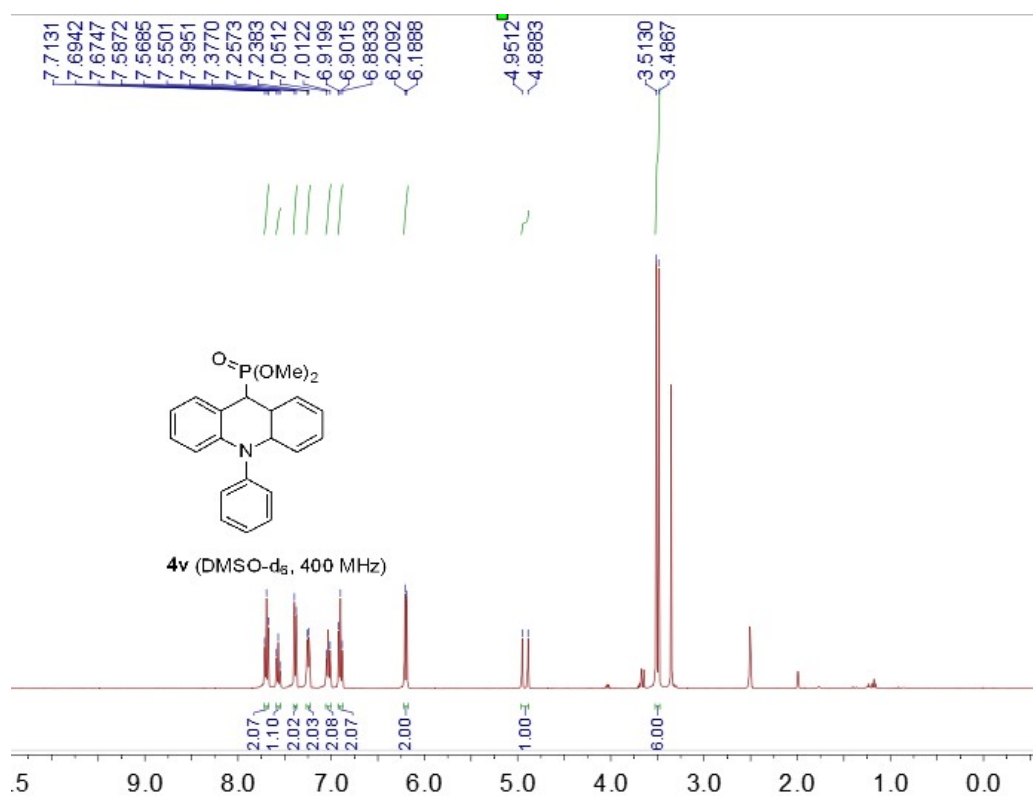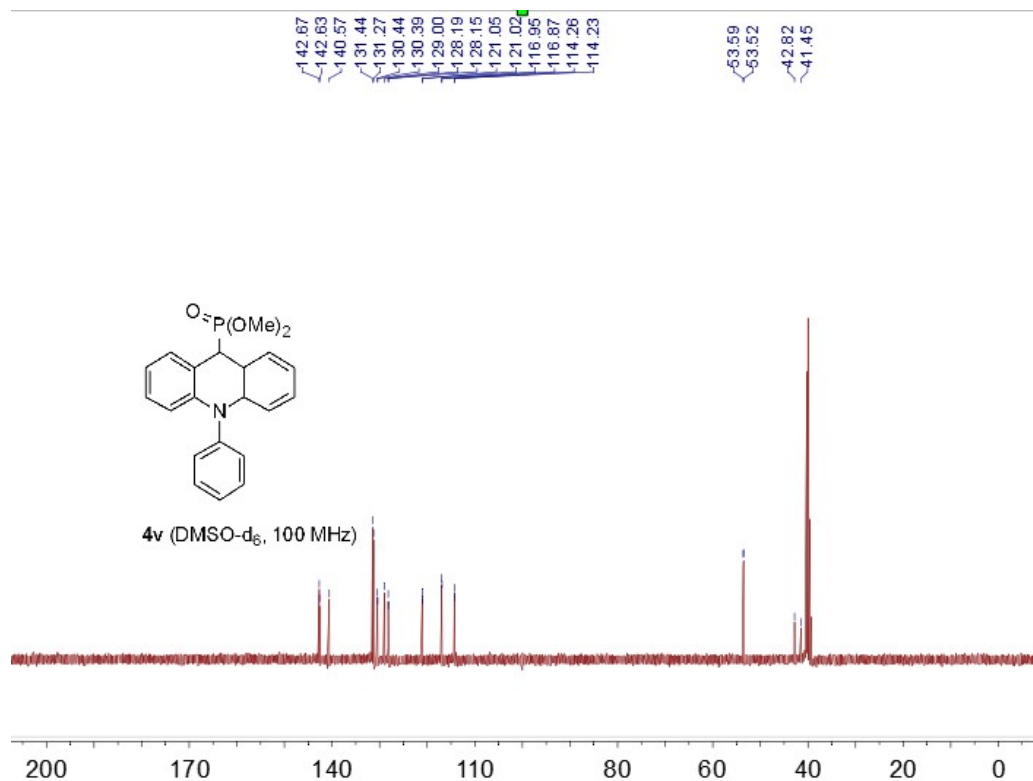

Supplement: c6ra02128j1.pdf [file c6ra02128j1.pdf]
